# Supplementary material
Source: publisher figshare collection journal article supplement (https://acs.figshare.com/ndownloader/files/5752677)
Supplement: Supplementary file 1 [file 5752677]

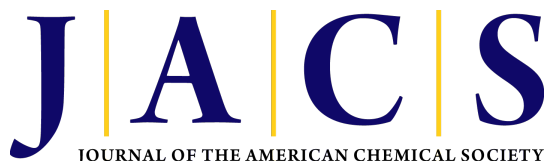

JOURNAL OF THE AMERICAN CHEMICAL SOCIETY

J. Am. Chem. Soc., 1997, 119(20), 4712-4718, DOI:[10.1021/ja963057n](https://doi.org/10.1021/ja963057n)

#### Terms & Conditions

Electronic Supporting Information files are available without a subscription to ACS Web Editions. The American Chemical Society holds a copyright ownership interest in any copyrightable Supporting Information. Files available from the ACS website may be downloaded for personal use only. Users are not otherwise permitted to reproduce, republish, redistribute, or sell any Supporting Information from the ACS website, either in whole or in part, in either machine-readable form or any other form without permission from the American Chemical Society. For permission to reproduce, republish and redistribute this material, requesters must process their own requests via the RightsLink permission system. Information about how to use the RightsLink permission system can be found at <http://pubs.acs.org/page/copyright/permissions.html>

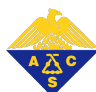

ACS Publications

MOST TRUSTED. MOST CITED. MOST READ.

Copyright © 1997 American Chemical Society

# Supplementary material on the calculations

JOURNAL OF THE AMERICAN  
CHEMICAL SOCIETY

## Structure 19

Zero-point correction= 0.100498 (Hartree/Particle)  
Thermal correction to Energy= 0.105049  
Thermal correction to Enthalpy= 0.105993  
Thermal correction to Gibbs Free Energy= 0.073965  
Sum of electronic and zero-point Energies= -192.704110  
Sum of electronic and thermal Energies= -192.699559  
Sum of electronic and thermal Enthalpies= -192.698615  
Sum of electronic and thermal Free Energies= -192.730644

1\1\ UOFC-OXYGEN\Freq\RMP2-FU\6-31G(d)\C3H7O1(1+)\JMCOXON\05-Mar-1996\  
1\#MP2=(FULL) 6-31G\* FREQ, IOP(7/33=1)\1,1\C\C  
,1,R2\C,2,R3,1,A3\O,2,R4,3,A4,1,D4,0\H,2,R5,3,A5,1,D5,0\H,1,R6,2,A6,3,  
D6,0\H,1,R7,2,A7,3,D7,0\H,4,R8,2,A8,3,D8,0\H,3,R9,2,A9,1,D9,0\H,3,R10,  
2,A10,1,D10,0\H,3,R11,2,A11,1,D11,0\R2=1.46034718\R3=1.48802808\R4=1.  
55859818\R5=1.08607268\R6=1.08368084\R7=1.08581452\R8=0.99012538\R9=1.  
0930279\R10=1.09537284\R11=1.09179718\A3=123.1725035\A4=116.0485629\A5  
=117.96584273\A6=120.71574929\A7=119.57942679\A8=110.4815283\A9=112.38  
964287\A10=107.44222424\A11=111.02912364\D4=-70.26272777\D5=163.209675  
66\D6=159.63595155\D7=-1.09775725\D8=12.93630268\D9=20.26924119\D10=-9  
8.15632781\D11=144.35144589\Version=SGI-G94RevB.3\HF=-192.2258925\MP2  
=-192.8046084\RMSD=9.973e-09\RMSF=1.056e-05\Dipole=0.3011492,0.0351163  
,-0.3913578\DipoleDeriv=0.1796456,-0.0278009,-0.0197478,-0.0205116,0.4  
642472,0.2284227,0.0108475,-0.0049679,0.2358171,0.36917,-0.1362808,0.1  
875837,-0.1509309,0.5991644,-0.3246217,0.1446682,-0.0930121,0.4589412,  
-0.0830961,0.0644763,-0.0763433,0.0600295,-0.1213449,0.0695462,-0.0880  
156,0.0582388,-0.1048953,-0.2115035,-0.0253673,-0.0629017,0.1413294,-1  
.0016646,0.1155247,-0.1010806,0.074721,-0.4021246,0.0663355,0.0062435,  
-0.0293927,0.0354262,0.1021113,-0.0015042,-0.0362059,0.0154397,0.07592  
54,0.1082397,0.0060815,0.0160826,0.0361161,0.1308572,0.0166654,0.01431  
56,-0.0189636,0.1022685,0.0733286,-0.0126872,0.0008813,-0.0403137,0.08  
3334,-0.0115507,-0.0182365,-0.0206321,0.1226383,0.2766737,0.1173375,0.  
0059425,0.0326945,0.4889121,-0.037983,0.0038896,-0.0268665,0.3023251,0  
.0536276,-0.0159763,0.0104778,-0.0626034,0.0868811,0.0243638,0.0693878  
,0.0488561,-0.004977,0.1069587,-0.015052,-0.0310118,-0.0280648,0.07223  
44,-0.0158932,-0.0083374,-0.0031396,0.131715,0.0606201,0.0390256,-0.00  
15706,-0.0031711,0.0952678,-0.06297,0.0087673,-0.0296738,0.0823663\Pol  
ar=30.1539428,0.2884263,28.8860461,2.3645756,-0.8160286,35.1809124\PG=  
C01 [X(C3H7O1)]\NImag=0\0.72300260,0.10095308,0.26196179,-0.01412134,  
0.08708736,0.66539612,-0.09122123,-0.01819995,-0.00198327,0.66429004,-  
0.01312435,0.00997629,0.02111048,0.10626314,0.25064746,0.00818962,-0.0  
1805179,-0.32982302,-0.03367389,-0.05354620,0.65917710,0.00703724,0.00  
240297,0.00157520,-0.21530446,-0.01362896,-0.06864299,0.56750792,-0.01  
625187,-0.00822522,-0.00564860,-0.02359889,-0.07614843,-0.02067380,0.0  
1831956,0.59381030,-0.02772721,0.00128408,-0.01506876,-0.06132475,-0.0  
0702061,-0.13536686,-0.04895249,0.01216171,0.59404293,-0.07086235,-0.0  
0559311,0.01918170,-0.06055465,-0.01499560,-0.01141898,-0.00574274,0.0  
3276713,-0.00507401,0.43594587,0.01726699,-0.13130334,-0.07875396,-0.0  
0033276,-0.09365992,0.05325075,0.00436201,-0.00673342,0.00803259,0.184  
76379,0.42666451,0.03190228,-0.01588647,-0.04467648,-0.01979990,-0.003  
76710,-0.03973749,-0.00567197,0.03370758,-0.00824982,-0.00362883,0.018

17732,0.13110650,0.00251082,0.00139323,-0.00385962,-0.28798646,-0.0715  
 8989,0.12328924,-0.01602038,-0.00639035,0.01140453,0.00797804,0.006785  
 20,-0.00587806,0.29239796,0.01598585,0.00289782,-0.00416471,-0.0610112  
 9,-0.06403979,0.02486296,0.00238411,0.00517164,-0.00170922,-0.02516389  
 ,-0.01555083,0.01681182,0.06848025,0.06966758,0.02562547,0.00833843,-0  
 .01443031,0.11267831,0.03728390,-0.11686513,-0.01711330,-0.00683285,0.  
 01259840,0.00154946,0.00140535,-0.00307666,-0.11911749,-0.04104102,0.1  
 2534508,-0.27420964,-0.08140889,-0.13192878,0.00309628,0.00178322,0.00  
 433294,0.00004577,0.00018437,0.00040575,0.00960072,0.00793606,0.006837  
 69,0.00103484,-0.00042750,0.00036577,0.27200132,-0.06939351,-0.0700740  
 0,-0.03704428,0.01691928,0.00300936,0.00225770,-0.00142233,0.00231009,  
 0.00283312,-0.02619984,-0.01523863,-0.01646475,-0.00050146,-0.00009658  
 ,-0.00113126,0.07801197,0.07728535,-0.12210373,-0.04914781,-0.13433358  
 ,-0.02353388,-0.00819110,-0.01051500,0.00226387,-0.00258705,-0.0032470  
 7,-0.00021006,-0.00221364,-0.00221007,-0.00028678,0.00109303,0.0011880  
 9,0.13202158,0.05346621,0.13784206,-0.29767217,-0.01001929,0.13029200,  
 0.00728792,0.00008114,-0.00358545,0.00119766,0.00080231,-0.00055017,-0  
 .00027240,-0.00136069,-0.00115679,0.00044934,-0.00065159,-0.00155513,-  
 0.01200367,0.00059700,0.01305225,0.29966592,-0.02038714,-0.04992917,0.  
 01084128,-0.01526853,-0.00506659,0.00358147,0.00037049,0.00042078,-0.0  
 0193101,0.02934102,-0.00544412,-0.02459798,0.00066702,0.00188964,0.002  
 64327,-0.00737922,0.00511274,0.00658183,0.01091608,0.04983148,0.124558  
 11,-0.00227368,-0.12646487,0.02731519,-0.00005058,-0.01228141,0.000829  
 18,0.00161920,0.00221058,-0.00091755,0.00158698,-0.00368491,-0.0007201  
 3,-0.00244349,-0.00301678,-0.01413528,0.00103883,0.01206884,-0.1369811  
 5,0.00232260,0.13066270,0.00472598,0.01143864,-0.00012899,0.00541977,0  
 .00581908,0.00340444,0.00325847,0.00114792,-0.00194924,-0.31575942,-0.  
 22312009,-0.00099150,0.00015851,0.00104857,-0.00018509,-0.00014467,0.0  
 0153397,0.00004807,0.00120931,0.00160939,0.00131032,0.30387571,-0.0164  
 0311,-0.01796817,0.00308035,-0.01372510,-0.01869785,-0.00138609,-0.000  
 73047,0.00440460,0.00081317,-0.17250819,-0.16509544,-0.00151981,0.0007  
 1613,-0.00176082,-0.00083303,0.00096015,-0.00199022,0.00080551,-0.0000  
 9201,0.00324373,-0.00118797,0.20064724,0.19788006,-0.02281018,-0.01001  
 308,-0.00221748,0.02400017,0.00992472,-0.00041771,-0.00000716,-0.00243  
 463,0.00069903,0.00197889,0.00113385,-0.02988635,-0.00193853,0.0053554  
 4,-0.00064823,0.00203375,-0.00548197,-0.00049057,0.00033660,0.00066163  
 ,0.00054492,-0.00231039,0.00076976,0.03303037,0.00118163,-0.00078721,0  
 .00174921,-0.02541630,-0.00966006,0.01416092,-0.22455844,-0.07213090,0  
 .11573345,0.00217361,0.00077896,0.00162350,-0.00200382,0.00028558,-0.0  
 0375658,0.00028023,-0.00027343,-0.00001415,0.00023314,0.00035154,-0.00  
 095185,-0.00130515,0.00128819,-0.00100329,0.24383318,-0.00048595,0.000  
 82895,0.00027133,0.00415738,-0.00330959,0.00165429,-0.07272884,-0.0789  
 7437,0.04462196,0.00069172,0.00065814,-0.00168354,0.00042168,0.0015082  
 2,0.00016357,0.00015573,-0.00006822,-0.00008706,-0.00034683,0.00008315  
 ,-0.00038181,0.00039162,0.00000346,0.00023606,0.07800679,0.07985066,-0  
 .00103787,-0.00038357,0.00218729,-0.02067614,-0.00824844,0.01034759,0.  
 11819340,0.04787794,-0.13354513,0.00054000,-0.00118980,0.00129992,-0.0  
 0318931,0.00076228,-0.00227769,0.00013019,-0.00015629,0.00001782,0.000  
 32862,-0.00002376,-0.00026089,0.00100624,0.00045182,0.00026903,-0.1234  
 9209,-0.05219351,0.13802909,0.00121132,0.00131150,0.00077300,-0.003629  
 12,0.02798638,-0.00558064,-0.05788358,0.04560964,-0.01489046,-0.004842  
 25,0.00198203,-0.00596785,0.00058697,-0.00108734,0.00086830,-0.0000374  
 3,-0.00005721,0.00006625,0.00000732,-0.00026740,-0.00021495,-0.0012986  
 9,-0.00080504,-0.00002663,0.00652175,-0.02641738,0.00777768,0.06025983  
 ,0.00047061,0.00064156,0.00098333,0.00292952,-0.00205076,0.00241969,0.

04457443,-0.30028262,0.07331125,-0.00210465,0.00403434,-0.00347785,0.0  
0019757,0.00038228,0.00035083,0.00000997,-0.00004813,-0.00001573,0.000  
11691,-0.00011555,-0.00001662,-0.00025704,-0.00014128,-0.00047215,0.00  
269109,-0.00783566,0.00092419,-0.05123459,0.32087618,0.00093210,0.0011  
0461,0.00005955,-0.00278357,0.01992169,-0.00701035,-0.01415882,0.07373  
369,-0.06684490,-0.00380237,-0.00090590,-0.00291185,0.00027897,-0.0003  
8611,0.00054487,-0.00011704,-0.00001291,0.00013586,-0.00013028,0.00001  
690,-0.00025251,-0.00001534,-0.00109777,0.00010289,-0.00408384,0.01600  
911,-0.00506570,0.01782942,-0.08073114,0.07169854,-0.00570421,-0.00149  
098,-0.00154911,0.00401823,-0.01893410,-0.03047520,-0.05953748,0.01954  
107,0.03292461,0.00233557,0.00093848,0.00273142,0.00089418,0.00015724,  
0.00064026,0.00033625,0.00078556,-0.00130342,-0.00010237,0.00004675,-0  
.00009188,-0.00013982,0.00065221,-0.00025323,-0.00093982,0.01615409,0.  
02041928,-0.00089612,0.00260617,0.00605078,0.05973558,0.00136940,0.001  
19349,0.00223742,0.00186719,-0.00066020,0.00563102,0.01609702,-0.13575  
335,-0.13239704,-0.00099839,0.00166872,-0.00129921,-0.00017938,-0.0000  
6915,-0.00034719,0.00017415,-0.00020176,0.00029580,-0.00004305,-0.0000  
2609,-0.00021345,-0.00025930,0.00012194,0.00032038,-0.00055055,0.00725  
526,0.01217914,0.00297940,-0.01546035,-0.02765217,-0.02045648,0.141931  
49,-0.00340725,-0.00205807,-0.00062845,-0.00021826,-0.00741676,-0.0175  
0772,0.03168508,-0.13092319,-0.24722842,0.00180175,-0.00052354,0.00202  
721,0.00001718,0.00085902,0.00063835,0.00005343,0.00069561,-0.00045637  
,-0.00005052,-0.00009624,0.00047433,-0.00018852,0.00010404,-0.00098591  
,0.00003472,-0.00861039,-0.01100133,-0.00063411,0.00672421,0.00954360,  
-0.02909350,0.14124531,0.26512471,-0.00000361,0.00003412,0.00000092,0  
.00000147,-0.00001327,-0.00000874,-0.00001241,0.00000652,0.00001113,-0  
.00000762,-0.00003642,0.00000293,-0.00000254,0.00000457,0.00000101,-0.  
00000410,0.00000368,0.00000213,0.00000010,-0.00000432,-0.00000074,0.00  
001712,-0.00000088,-0.00000754,0.00000412,0.00000334,0.00000010,0.0000  
0760,0.00000195,-0.00000254,-0.00000014,0.00000071,0.00000136\\@

## Structure 21

|                                              |                             |
|----------------------------------------------|-----------------------------|
| Zero-point correction=                       | 0.100445 (Hartree/Particle) |
| Thermal correction to Energy=                | 0.105023                    |
| Thermal correction to Enthalpy=              | 0.105967                    |
| Thermal correction to Gibbs Free Energy=     | 0.073875                    |
| Sum of electronic and zero-point Energies=   | -192.704413                 |
| Sum of electronic and thermal Energies=      | -192.699836                 |
| Sum of electronic and thermal Enthalpies=    | -192.698892                 |
| Sum of electronic and thermal Free Energies= | -192.730983                 |

1\\ UOFC-OXYGEN\Freq\RMP2-FU6-31G(d)\C3H7O1(1+)\JMCOXON\08-Apr-1996\  
0\\#MP2=(FULL) 6-31G\* FREQ IOP(7/33=1) GEOM=CHECKPOINT\\  
\\1,1\\C,1.08  
63932441,1.0831708527,-0.2812929995\\C,-0.0568682187,0.4031665798,0.378  
6730571\\C,-1.1066111303,-0.2939111044,-0.3596029781\\O,0.0080473218,-1.  
1494525243,0.2228723496\\H,-1.0568069972,-0.348482108,-1.441324958\\H,-2  
.0723042,-0.4829013142,0.0980650062\\H,-0.2892812605,-1.6120147964,1.04  
56199754\\H,-0.2735462286,0.6580597257,1.4138460698\\H,0.8252607316,2.14  
21612041,-0.3832868116\\H,1.2781313262,0.6723337054,-1.2735364502\\H,1.9  
866846835,1.0119058095,0.3309758945\\Version=SGI-G94RevB.3\\HF=-192.226  
4139\\MP2=-192.8048585\\RMSD=9.612e-09\\RMSF=5.481e-05\\Dipole=-0.8378748,  
-0.3055837,0.6239101\\DipoleDeriv=-0.0836148,-0.0751993,0.0326374,-0.06  
56125,-0.1561744,0.0362248,0.0213782,0.0300267,-0.0541527,0.3947556,0.

0605044,-0.0329638,0.2591528,0.8495962,-0.0487302,-0.0692749,-0.184096  
 7,0.2515277,0.2953884,-0.0475369,0.0817989,-0.2419831,0.3153834,-0.144  
 4198,0.1222869,0.0010375,0.2572957,-0.3400826,0.0912988,-0.0997522,0.0  
 635152,-0.9991872,0.2320619,-0.1378692,0.2729611,-0.311258,0.080314,0.  
 0122011,0.0336452,0.0020379,0.1246524,-0.010414,0.0087045,0.0106459,0.  
 1225481,0.1072657,0.0089343,-0.0120986,-0.0238877,0.1042527,0.0312164,  
 0.0032873,0.0158868,0.0768137,0.2745129,0.0189295,0.0041914,-0.0076068  
 ,0.4259576,-0.0895974,0.0161189,-0.1716345,0.3864206,0.0710373,-0.0237  
 09,0.0162796,-0.0412767,0.0515469,0.0488282,0.0309191,0.0106995,0.0547  
 331,0.0659047,0.0219606,0.0148546,0.040439,0.0865837,-0.0062225,0.0274  
 079,0.0091295,0.1274482,0.0784289,-0.043177,-0.0234503,-0.0038973,0.07  
 91127,-0.0722285,0.0029985,-0.0349827,0.0356321,0.0560898,-0.0242064,-  
 0.0151421,0.0191192,0.118276,0.0232812,-0.0259572,0.0403268,0.0529914\  
 Polar=32.7497623,4.4444472,31.8392988,0.7557337,-0.763355,30.0570171\  
 G=C01 [X(C3H7O1)]\NImag=0\0.57904220,-0.03076220,0.56967635,0.0255006  
 0,0.03219960,0.61832230,-0.19853180,-0.04471231,0.06343535,0.52216807,  
 -0.06130245,-0.08953457,0.02590626,0.17099464,0.35703256,0.06128835,0.  
 02291500,-0.13624615,-0.05549683,0.11247059,0.68498622,-0.02141069,0.0  
 0189917,-0.01730326,-0.19281528,-0.13761677,-0.07673235,0.65966382,-0.  
 01053046,-0.00531612,-0.00735039,-0.10122301,-0.06736394,-0.06983972,0.  
 .13465622,0.26807824,0.01454393,-0.00248343,0.01308430,-0.07742343,-0.  
 08848366,-0.15158472,-0.03963125,0.03199142,0.72217238,0.01250558,-0.0  
 2586678,0.00332214,-0.02383406,0.02660609,0.00722447,-0.10994167,0.016  
 19948,0.00529367,0.21686431,0.00031188,-0.03108134,0.00374466,0.001635  
 67,-0.09813188,-0.04048458,0.07592891,-0.07025645,0.05506036,-0.002736  
 90,0.31873926,-0.00752749,0.01664524,0.00149586,0.01461154,0.01581359,  
 -0.06852529,-0.02773911,0.03312589,-0.06611079,-0.10115182,-0.19868044  
 ,0.45658487,0.00167901,-0.00098197,-0.00077016,-0.00010520,0.00036229,  
 -0.01756198,-0.05880045,-0.00082599,0.03300162,-0.00256388,0.00292396,  
 -0.02110747,0.05993524,0.00225957,0.00065188,0.00108817,0.00734653,-0.  
 00043548,-0.02786292,-0.00697122,-0.04859237,-0.02680697,-0.00014291,-  
 0.00336362,0.03054830,-0.00135880,0.04687187,0.00084007,0.00027206,0.0  
 0116185,0.00046549,0.00017106,-0.00637707,0.01981441,-0.01433662,-0.36  
 779417,0.00004060,-0.00071315,-0.00293391,-0.01774944,0.01695340,0.378  
 97003,-0.00020744,0.00022151,-0.00115945,-0.00852795,0.00022027,0.0037  
 4399,-0.29295672,-0.04702259,0.11737918,-0.01243537,-0.00366615,0.0018  
 4324,0.00554548,-0.00089876,-0.00177842,0.30800027,-0.00350388,0.00126  
 782,-0.00438768,-0.01911055,-0.00482177,0.01916590,-0.06113134,-0.0606  
 1357,0.02445435,0.03165040,0.00282241,-0.00856083,0.00037862,0.0038711  
 9,-0.00193362,0.05144914,0.05518681,-0.00121907,0.00040901,-0.00164035  
 ,-0.01562930,-0.00182759,0.00652974,0.12824568,0.02739613,-0.12399824,  
 -0.01512361,-0.00219181,0.00072778,0.02633341,0.00468413,-0.00427671,-  
 0.12141139,-0.02764749,0.11824157,0.00112674,-0.00335518,0.00018902,-0.  
 .00846973,0.00443619,0.00428004,0.00865513,0.01501147,-0.02647264,-0.0  
 7521726,-0.07487987,0.12966833,-0.00303265,0.00489717,-0.00056942,0.00  
 004698,-0.00095031,-0.00073862,0.07614071,0.00209502,-0.00525912,-0.00  
 028970,-0.00612618,-0.01126646,0.02474161,-0.00028916,-0.01191317,0.00  
 536306,-0.04657841,-0.10920869,0.13929708,-0.00096743,0.00015989,-0.00  
 070385,-0.00002096,0.00290683,0.00015150,0.05421485,0.13230477,0.00147  
 618,-0.00336876,-0.00033137,-0.00402960,-0.00115203,0.00893331,0.00794  
 795,0.00058067,-0.01176130,0.10262364,0.17291383,-0.32923606,-0.001672  
 43,0.00225854,0.00019314,0.00082988,-0.00183747,0.00255051,-0.10574000  
 ,-0.16745683,0.32787022,-0.00126127,0.00645156,0.02220849,-0.06788648,  
 0.00696311,0.06093706,0.00668683,-0.00724315,-0.03137846,-0.00329033,0.  
 .00567633,0.00943029,-0.00183357,-0.00460740,-0.00062626,0.00058515,0.

00167634,0.00027055,0.00141733,-0.00137090,-0.00028588,0.06687688,-0.0  
 0371731,0.01032481,0.01709184,0.01236115,-0.06502935,-0.05326606,-0.00  
 168224,-0.00505286,-0.00066970,-0.00054728,-0.01645889,-0.02946187,0.0  
 0029155,0.00062226,0.00042105,-0.00015566,0.00039926,-0.00084595,0.001  
 01191,0.00185095,-0.00192064,-0.00497851,0.07403107,0.00108849,-0.0032  
 4479,-0.00715191,0.05835282,-0.07047080,-0.33398182,0.00435095,-0.0017  
 7725,-0.01307286,-0.00205541,0.00743898,0.00955398,-0.00101554,-0.0015  
 1103,0.00050664,0.00019421,0.00032322,0.00109966,-0.00025671,-0.001603  
 63,0.00087781,-0.06187623,0.06960143,0.34057375,-0.06569771,0.06506540  
 ,-0.00403833,0.00831045,-0.02406634,0.00087900,0.00212158,-0.00024733,  
 -0.00062941,-0.00519214,-0.00554091,0.00358184,-0.00027688,-0.00004698  
 ,-0.00018906,-0.00003224,0.00012898,0.00010254,-0.00082428,-0.00121858  
 ,-0.00101109,0.00051721,0.00109523,-0.00001701,0.06747956,0.06616700,-  
 0.30963974,0.02480421,0.00332079,-0.01951192,0.00191576,-0.00032467,-0  
 .00030441,-0.00075635,-0.00173508,0.00291610,0.00181609,-0.00015978,-0  
 .00016023,0.00005121,0.00003111,-0.00001781,0.00008703,-0.00039451,-0.  
 00005526,-0.00037654,-0.00032621,0.00059425,-0.00004621,-0.06826935,0.  
 33525331,-0.00395160,0.02599552,-0.05042353,-0.00556418,0.01318667,-0.  
 00266277,-0.00070540,-0.00005734,0.00014541,0.00243529,0.00292206,-0.0  
 0151143,0.00010899,-0.00014518,0.00011704,0.00002911,-0.00005549,0.000  
 03521,0.00003436,0.00049444,0.00068236,-0.00001447,-0.00111676,0.00017  
 744,0.00470615,-0.02911884,0.05018259,-0.06187384,0.01568582,0.0409780  
 9,-0.00714972,0.01242424,0.02689421,0.00132476,0.00107776,0.00181286,0  
 .00098982,0.00019363,-0.00159503,-0.00053704,-0.00059306,-0.00045009,-  
 0.00001178,0.00037006,-0.00032804,0.00019741,0.00019834,0.00002325,-0.  
 00282855,-0.00350346,0.00121869,-0.00191198,0.00227269,0.00622661,0.06  
 372087,0.01941799,-0.09174922,-0.10365952,-0.00608696,0.00318398,0.020  
 37407,0.00016546,0.00154472,0.00043109,0.00121770,0.00125977,0.0002517  
 9,0.00010885,0.00013131,-0.00037875,0.00004573,0.00006653,0.00001112,0  
 .00021049,0.00015244,0.00018976,-0.00321602,-0.00128200,0.00118887,0.0  
 0494782,-0.00912049,-0.03071238,-0.01638574,0.09529933,0.04336557,-0.1  
 0100999,-0.28933391,0.00323755,-0.00336171,-0.01375607,-0.00080392,-0.  
 00083952,0.00107120,-0.00057684,-0.00032163,-0.00001619,0.00017509,0.0  
 0050945,0.00037686,-0.00001017,-0.00017616,0.00015412,-0.00041743,0.00  
 000593,0.00003490,0.00173213,0.00078820,0.00076803,-0.00187484,0.00276  
 233,0.00538809,-0.04984843,0.10827573,0.30858879,-0.24537078,0.0163549  
 8,-0.13236249,-0.02315830,0.00097875,-0.01545598,-0.00252730,0.0001475  
 9,0.00350394,0.00211500,0.00015346,-0.00001431,-0.00001007,0.00011585,  
 0.00020212,-0.00000637,-0.00095746,-0.00050215,-0.00004037,0.00006341,  
 -0.00016190,0.00101681,-0.00017539,0.00001573,-0.00449356,-0.00058199,  
 -0.00330487,0.00808005,-0.00042533,0.00502130,0.26439488,0.01956485,-0  
 .04934076,0.01085255,-0.01839976,-0.00412116,-0.01012964,-0.00463437,-  
 0.00021008,0.00189984,0.00193369,0.00276332,-0.00079483,0.00022870,0.0  
 0024331,0.00019721,-0.00020363,-0.00106770,-0.00022608,-0.00020222,0.0  
 0032782,0.00016949,0.00097486,0.00000050,0.00010121,0.02815205,0.00004  
 619,0.01860730,-0.01174028,0.00051364,-0.00663264,-0.01567388,0.050844  
 92,-0.13540502,0.01167054,-0.14893709,0.01804059,-0.00225237,0.0126846  
 3,0.00255631,0.00110674,-0.00215123,-0.00203214,0.00031175,-0.00002882  
 ,0.00025790,0.00028410,0.00005630,0.00033982,0.00065526,0.00057671,0.0  
 0002306,0.00000039,0.00018647,-0.00039722,-0.00062153,0.00064927,-0.00  
 150978,-0.00113870,-0.00213041,-0.02493213,0.00402823,-0.01327583,0.14  
 305861,-0.01404440,0.15236999,-0.00003921,0.00004029,0.00002658,0.000  
 13467,-0.00023556,-0.00003627,-0.00006072,0.00005639,0.00000693,-0.000  
 00911,0.00010120,-0.00000827,0.00000524,-0.00000841,-0.00000856,-0.000  
 01324,-0.00000041,-0.00000828,-0.00000266,0.00001849,0.00002314,-0.000

00858,0.00002285,0.00000432,-0.00002044,0.00000220,-0.00000856,0.00001  
072,-0.00001234,-0.00000149,0.00000335,0.00001530,0.00001047\\@

## Structure 28

Zero-point correction= 0.094906 (Hartree/Particle)  
Thermal correction to Energy= 0.100703  
Thermal correction to Enthalpy= 0.101647  
Thermal correction to Gibbs Free Energy= 0.066054  
Sum of electronic and zero-point Energies= -192.689837  
Sum of electronic and thermal Energies= -192.684040  
Sum of electronic and thermal Enthalpies= -192.683096  
Sum of electronic and thermal Free Energies= -192.718689

1\\ UOFC-OXYGEN\Freq\RMP2-FU6-31G(d)\C3H7O1(1+)\JMCXON\20-Mar-1996\  
0\\#N GEOM=ALLCHECK GUESS=READ TEST RMP2(FULL)/6-31G(D) FREQ\\  
\\1,1C,-0.9293417178,0.0176796795,-1.2569415812C,-0.9284169115,0.00  
3512314,0.1729426165C,0.2879122071,0.0074555811,0.9504205589O,1.4036  
589323,-0.012228071,0.1270814545H,0.1796755463,0.9183361785,1.5894550  
14H,0.2163120827,-0.8256445498,1.6813921327H,-1.8634655371,-0.028860  
8813,0.7360522812H,-1.8992422567,0.1721579548,-1.7216718004H,-0.1263  
629618,0.6613003027,-1.6423757832H,-0.5368594704,-0.9943796612,-1.516  
5543731H,2.219749672,0.023029777,0.6585213273\\Version=SGI-G94RevB.3\  
HF=-192.223297\MP2=-192.784743\RMSD=1.113e-09\RMSF=1.284e-07\Dipole=-0  
.8032746,-0.0403872,0.6891708DipoleDeriv=-0.0439382,0.0059765,0.44165  
72,-0.0994336,-0.2293627,-0.39499,0.0410138,-0.1360044,-0.8154796,0.45  
34287,0.0358743,0.3421601,0.0634169,0.2572606,0.1059804,0.3195723,0.13  
12759,1.3297896,0.5263593,-0.0442987,-0.4738182,-0.1223051,0.1244194,-  
0.0947183,-0.8549305,-0.0657301,-0.5362468,-0.8964902,0.0102584,0.0914  
567,0.0115135,-0.499584,0.0207906,0.2919903,0.0163729,-0.2615225,-0.03  
2135,0.0216606,-0.0349488,0.0838181,0.1212293,0.0232367,0.1419765,-0.0  
069652,0.2263075,0.0049275,-0.0260323,-0.0066797,-0.0287637,0.1185774,  
0.0270048,0.1586812,0.0217032,0.2254182,0.1350135,-0.0024876,-0.002153  
9,0.0205172,0.13581,0.0063685,-0.0054649,0.0034292,0.08586,0.0894064,0  
.0035075,0.007288,0.0116921,0.1520824,0.0575051,0.0120772,0.003288,0.1  
139295,0.1362134,-0.0156887,-0.1834688,0.0018982,0.197349,0.0697445,-0  
.0368411,-0.0295503,0.2090982,0.178755,0.010995,-0.1868094,0.0554855,0  
.2086523,0.1830424,-0.0467725,0.0693652,0.1739595,0.4484595,0.0002349,  
0.0053169,0.0021609,0.4135662,-0.0039647,-0.0213022,-0.0071845,0.24888  
65\Polar=37.1041888,0.1197147,24.3999137,4.6507822,1.034508,42.1558271  
\PG=C01 [X(C3H7O1)]\NImag=0\0.64614467,0.00236226,0.43166310,0.068080  
05,-0.05367611,0.57697917,-0.11739995,0.00241975,0.00695113,0.68615521  
,-0.00230617,-0.07343588,0.01683465,0.00345459,0.24283244,-0.03459629,  
0.03763365,-0.30775935,-0.04222673,-0.02131084,0.65005860,0.00703143,-  
0.00218042,-0.00765948,-0.24603736,0.00229980,-0.10036035,0.61582313,-  
0.00413093,0.02496947,-0.00565306,0.00709273,-0.07701367,0.01479659,-0  
.00789022,0.45262830,-0.01402903,-0.01473275,-0.03499830,-0.06409509,0  
.01016763,-0.10631013,-0.01334540,-0.02466199,0.52399996,0.00302934,-0  
.00137671,0.00000474,-0.05754951,0.00211407,0.03469142,-0.23354996,0.0  
0271083,0.11119836,0.66994445,-0.00086133,-0.00442823,0.00147619,-0.00  
137356,0.00456864,-0.00143754,0.00092531,-0.05552974,-0.00026007,0.010  
63756,0.04481503,-0.00563436,0.00341222,0.00342971,-0.02013282,-0.0017  
2722,0.00378329,0.07559083,0.00096629,-0.15957090,0.08338456,0.0140201  
1,0.37354591,-0.00105020,0.00433595,-0.00534256,0.00640499,-0.02234958  
,-0.00683355,-0.04886379,-0.00893048,-0.00584418,-0.01321206,0.0231018



5,0.02676750,0.05180528,-0.00186756,-0.00149693,0.00293728,-0.00084124  
 ,-0.00924707,-0.00501201,0.00570606,-0.18546946,-0.10625905,0.00607888  
 ,0.00515283,-0.00049418,-0.00575483,0.21457448,-0.00526458,0.00399807,  
 0.00238331,-0.00706235,-0.01966909,-0.02338019,0.01249936,-0.11676619,  
 -0.10416726,0.01038242,-0.01293833,-0.01469638,-0.01424924,0.12387656,  
 0.12975013,0.00007456,-0.00753241,-0.00272904,0.00386415,0.02346625,-0  
 .01470432,-0.05090651,0.00834537,-0.00241983,-0.01145835,-0.02068779,0  
 .02759039,0.00339834,-0.00432025,0.00271735,0.05538675,0.00026837,-0.0  
 0303677,-0.00114637,-0.00213233,-0.00401864,-0.00298994,-0.00006851,-0  
 .17283521,0.12433535,-0.00477937,0.00596580,-0.00235882,0.00582363,-0.  
 02578045,0.01801022,0.00123250,0.19722088,-0.00423284,0.00207291,0.003  
 47724,-0.00795550,0.01485129,-0.02543381,0.00960633,0.12868906,-0.1344  
 7506,0.01043373,0.01142262,-0.01608131,0.00344227,-0.01441911,0.008604  
 93,-0.01130421,-0.13631692,0.16295855,0.00797371,0.00072981,-0.0036042  
 4,-0.27917729,-0.00824984,0.12435158,-0.01445250,-0.00006641,0.0188076  
 4,-0.00328354,-0.00033804,-0.00487755,0.00076637,-0.00064782,-0.000253  
 90,0.00063355,0.00056857,-0.00019787,0.28673455,0.00705953,0.02894748,  
 -0.00203651,-0.00769241,-0.06608704,0.00415146,-0.00007988,0.00806724,  
 0.00166206,0.00000831,0.00284115,-0.00037267,-0.00034983,0.00148452,0.  
 00314646,0.00042685,0.00085172,-0.00319779,0.00811931,0.02917540,0.024  
 63225,0.00474046,-0.00776549,0.12732523,0.00330793,-0.14300717,-0.0161  
 0512,0.00025333,0.01525032,-0.00456322,-0.00011677,-0.00319695,0.00098  
 752,-0.00048593,0.00053865,0.00065487,0.00055221,0.00031304,-0.1336189  
 3,-0.00586045,0.14152345,-0.30062514,0.03793813,-0.11354397,0.00815071  
 ,-0.00236461,0.00375875,-0.00029487,0.00303248,0.00275356,-0.00025333,  
 -0.00015576,-0.00109009,0.00081462,-0.00008998,0.00037441,-0.00024485,  
 -0.00014279,-0.00027264,0.00088795,-0.00120433,0.00012334,0.31136713,0  
 .03586165,-0.05560146,0.02427093,-0.00295175,-0.00441883,-0.00611229,-  
 0.00036658,0.00806198,0.00120396,0.00005151,-0.00005508,-0.00065708,0.  
 00170316,-0.00038639,0.00064961,-0.00111492,-0.00024490,-0.00114592,0.  
 00011966,-0.00291876,0.00000311,-0.04180928,0.05364668,-0.10695631,0.0  
 2241946,-0.10526027,-0.03646715,0.00612343,-0.01739436,0.00358407,-0.0  
 0101214,-0.00476337,0.00123740,0.00023116,0.00125405,-0.00094935,0.000  
 17869,-0.00059747,-0.00047138,0.00000136,-0.00055243,-0.00005018,-0.00  
 098782,0.00184215,0.11993899,-0.02077016,0.11424426,-0.19023378,-0.120  
 09192,0.05339134,0.00310344,0.00283037,0.01726270,0.00033731,-0.001144  
 84,-0.00749808,-0.00201458,0.00155008,0.00042527,-0.00148215,0.0010689  
 5,0.00105847,-0.00138943,0.00008281,0.00141008,0.00044637,-0.00416764,  
 0.00030548,-0.01177125,-0.01478318,0.01070523,0.20201216,-0.12027125,-  
 0.12542072,0.06888233,0.00351584,-0.00222659,-0.01020881,-0.00087585,0  
 .00087498,0.00389971,-0.00013790,-0.00085266,-0.00132254,0.00048487,-0  
 .00005622,-0.00063993,0.00044655,0.00020599,-0.00049593,0.00021786,-0.  
 00082462,-0.00201473,0.00626285,0.00439043,-0.00527600,0.13002904,0.14  
 609790,0.06202480,0.06667071,-0.07837665,0.02671075,0.02321182,-0.0163  
 0705,0.00135153,-0.00550278,-0.00066192,-0.00007519,0.00048966,0.00017  
 040,-0.00150708,0.00064039,-0.00046931,0.00150737,0.00038414,0.0008189  
 0,-0.00145371,-0.00239976,-0.00460465,-0.00811519,-0.01050178,0.006390  
 52,-0.07589386,-0.06531649,0.08707541,-0.05511357,0.08292688,0.0032317  
 6,-0.00216111,0.00147917,0.01607169,0.00061982,0.00154081,-0.00760281,  
 -0.00039312,0.00026437,0.00191849,-0.00112104,0.00059009,0.00162229,-0  
 .00154786,-0.00040570,0.00075795,0.00004056,-0.00206418,0.00115577,-0.  
 00805026,0.02332378,0.00942949,0.00103786,-0.01975234,-0.00409010,0.06  
 672975,0.08357580,-0.22254314,-0.05165959,-0.00188738,-0.01025513,-0.0  
 0976807,0.00121433,0.00296712,0.00442768,0.00099663,-0.00006229,-0.000  
 29640,0.00129588,-0.00031164,-0.00036062,0.00035376,0.00034997,-0.0007



9281,-0.00046773,-0.00333485,-0.00047231,-0.00156582,-0.00273237,-0.00  
086269,0.00498334,-0.02229612,-0.00713276,-0.08811720,0.25811033,0.017  
14809,-0.07278079,-0.05160707,0.01175388,-0.03181958,-0.00950928,-0.00  
091774,0.00780057,-0.00439720,-0.00008007,-0.00096414,0.00067846,0.002  
19026,-0.00034161,0.00162033,-0.00230153,-0.00103332,0.00016654,-0.000  
19397,0.00587013,-0.00181516,-0.00377154,0.01317213,0.00459805,-0.0010  
3232,0.01305305,0.00554281,-0.02265745,0.06658600,0.05466779,0.0001689  
1,0.00046868,0.00122028,-0.00535329,-0.00037403,0.00258511,-0.02970670  
,-0.00055934,-0.01792514,-0.35125934,-0.01306270,-0.18394223,0.0025396  
3,0.00007770,-0.00182423,0.00218966,-0.00044717,-0.00168728,-0.0005697  
4,-0.00005573,-0.00089720,0.00001929,-0.00003405,-0.00000082,-0.000045  
94,0.00008032,-0.00045932,-0.00004101,-0.00038163,-0.00013760,0.382058  
53,0.00030964,0.00038308,-0.00022973,0.00039577,-0.00069823,0.00025781  
,0.00131595,-0.00672100,0.00021747,-0.01630381,-0.00241546,-0.01116971  
,0.00063938,0.00153632,0.00069325,-0.00061591,0.00132160,-0.00066740,0  
.00001463,0.00179774,0.00009315,0.00009910,0.00025871,-0.00004528,-0.0  
0035701,0.00010764,-0.00054313,0.00021431,0.00010812,0.00045756,0.0142  
8794,0.00432148,-0.00117177,0.00024218,-0.00050230,0.00519864,0.000029  
98,-0.00474055,0.03575597,0.00109033,0.01009385,-0.24661417,-0.0119228  
9,-0.18931629,0.00133843,-0.00062101,0.00041325,0.00146033,0.00056209,  
0.00020341,0.00109113,0.00002489,0.00092181,-0.00015562,-0.00011250,0.  
00023886,-0.00013429,-0.00056065,0.00042154,0.00016292,0.00033157,0.00  
005472,0.20306842,0.01093601,0.18221170,0.00000010,0.00000031,0.00000  
002,-0.00000032,0.00000009,-0.00000021,-0.00000002,-0.00000013,0.00000  
025,-0.00000006,0.00000014,0.00000002,0.00000007,-0.00000005,0.,0.0000  
0010,0.00000010,-0.00000003,0.00000005,-0.00000008,0.00000006,0.000000  
01,0.,0.00000010,-0.00000001,-0.00000030,-0.00000012,0.00000010,0.,-0.  
00000006,-0.00000002,-0.00000007,-0.00000002\\\@

## Structure 26

Zero-point correction= 0.100143 (Hartree/Particle)  
Thermal correction to Energy= 0.105280  
Thermal correction to Enthalpy= 0.106224  
Thermal correction to Gibbs Free Energy= 0.072436  
Sum of electronic and zero-point Energies= -192.731246  
Sum of electronic and thermal Energies= -192.726108  
Sum of electronic and thermal Enthalpies= -192.725164  
Sum of electronic and thermal Free Energies= -192.758953

1\1\ UOFC-OXYGEN\Freq\RMP2-FU\6-31G(d)\C3H7O1(1+)\JMCXON\05-Mar-1996\  
1\#MP2=(FULL) 6-31G\* FREQ, IOP(7/33=1)\\\1,1\C\  
C,1,R2\C,2,R3,1,A3\O,3,R4,2,A4,1,D4,0\H,3,R5,2,A5,1,D5,0\H,2,R6,3,A6,1  
,D6,0\H,2,R7,3,A7,1,D7,0\H,1,R8,2,A8,3,D8,0\H,1,R9,2,A9,3,D9,0\H,1,R10  
,2,A10,3,D10,0\H,4,R11,3,A11,2,D11,0\R2=1.56045062\R3=1.44915591\R4=1  
.27330299\R5=1.09343409\R6=1.09578213\R7=1.09116291\R8=1.09051367\R9=1  
.09134952\R10=1.09047769\R11=0.98879241\A3=106.96313318\A4=119.7326185  
2\A5=121.63083115\A6=108.5809687\A7=110.60552005\A8=106.95907538\A9=11  
1.96196755\A10=110.98547322\A11=114.41330388\D4=-106.215177\D5=70.2489  
741\D6=-117.02589108\D7=121.47351281\D8=-178.01742855\D9=-59.48689118\  
D10=63.58859209\D11=176.61278108\Version=SGI-G94RevB.3\HF=-192.262787  
1\MP2=-192.8313888\RMSD=8.120e-09\RMSF=1.371e-05\Dipole=1.1947115,0.42  
63471,0.6309042\DipoleDeriv=-0.1744864,0.0358868,-0.1850431,-0.0288979  
,0.0721943,-0.0007017,0.2352562,-0.0475832,0.403223,-0.3509871,0.10424  
96,-0.2152951,0.0472844,-0.0722338,-0.0075754,-0.4218051,0.1132631,-0.

5194681,1.188023,-0.2846198,0.604373,-0.4032544,0.8042601,-0.3714363,0  
 .4176556,-0.2667934,0.6280745,-0.6527246,0.3045001,-0.3419794,0.513948  
 2,-0.5747685,0.383608,-0.2731899,0.1994948,-0.4173031,0.0533932,-0.018  
 3801,-0.0113124,0.0133679,0.0965416,0.0177952,-0.0047542,0.0090351,0.1  
 347038,0.1172353,-0.0186728,-0.0183991,-0.0614961,0.0939522,-0.0508525  
 ,0.0413306,-0.0325652,0.1451485,0.0941777,0.0164902,-0.0233335,-0.0005  
 501,0.0668858,0.0353639,0.0129495,0.0265562,0.081921,0.06078,0.0011256  
 ,0.0208977,-0.0011968,0.1243415,-0.006861,-0.0560488,0.0122592,0.00722  
 14,0.0654041,-0.0753768,0.0422313,-0.0532281,0.006263,0.0279154,0.0041  
 702,-0.0188313,0.0430544,0.067229,0.0627804,0.0288647,0.0423004,0.0060  
 606,-0.0293538,-0.0216037,0.0196079,0.0238365,0.5319558,-0.1279833,0.0  
 989958,-0.0682775,0.3765032,0.0020983,0.0660397,-0.0144433,0.4695882P  
 olar=36.9880425,-3.2341464,31.4346967,7.4157662,-3.841629,32.8107188P  
 G=C01 [X(C3H7O1)]\NImag=0\0.60548953,-0.00034420,0.62736907,-0.011607  
 29,0.00034975,0.43153433,-0.06680242,-0.00864549,0.02620507,0.59009190  
 ,-0.00994519,-0.07638479,0.00130673,0.02480912,0.65587972,-0.01204830,  
 -0.00103163,-0.14410821,-0.04093828,-0.02527520,0.39397365,0.00347512,  
 0.00487888,-0.03336679,-0.27604278,-0.03585027,-0.01105164,0.70559878,  
 -0.00223538,-0.00476318,0.01027362,-0.02274069,-0.10075202,-0.01235258  
 ,0.00310360,0.80133430,-0.02563075,0.00154636,-0.02549857,-0.04195268,  
 -0.00710964,-0.07472682,0.12257059,-0.18869000,0.31571416,-0.00729620,  
 0.00046789,0.00997318,-0.01992272,0.04897586,-0.03047880,-0.19997695,0  
 .16850819,-0.09222955,0.64052320,0.00486819,0.00103897,-0.01269990,0.0  
 2102993,-0.00169526,0.02033432,0.10287012,-0.45398566,0.15568569,-0.12  
 847954,0.52327604,-0.00314838,-0.00037651,0.00415309,-0.01475608,0.017  
 98035,-0.00957891,-0.07038605,0.17256696,-0.13120879,0.19009266,-0.188  
 53743,0.16444324,0.00046294,0.00009986,-0.00036682,-0.00706204,-0.0232  
 5722,0.00609189,-0.18023348,-0.14345106,0.01822116,0.01556159,0.024055  
 18,-0.01124741,0.17009206,0.00075246,0.00038504,0.00024231,0.00211456,  
 0.00765119,0.00214072,-0.12854980,-0.23623970,0.02369487,-0.01255473,-  
 0.02526675,0.01520308,0.13956775,0.25229267,0.00319434,0.00042799,0.00  
 267086,-0.00851137,-0.00647210,0.01299968,0.01725558,0.02077841,-0.071  
 85231,0.00073068,0.02379227,0.02150748,-0.01114988,-0.03955208,0.03976  
 713,0.00341894,-0.00258394,-0.00011242,-0.10698568,0.09719163,0.039626  
 73,-0.01333500,0.03263549,0.01248720,-0.00681499,-0.00073281,-0.001585  
 39,0.00148350,-0.00134349,-0.00186449,0.11184430,0.00110062,0.00051372  
 ,0.00179762,0.09547897,-0.25110631,-0.07309807,0.00373117,-0.00266876,  
 0.00464699,-0.00142369,0.00302986,-0.00358729,0.00020969,0.00039551,0.  
 00090694,-0.11127242,0.26473479,0.01597849,-0.02851113,-0.01931691,0.0  
 4275307,-0.07194377,-0.05704688,-0.01003261,0.01438175,-0.00048325,-0.  
 00233750,-0.00167068,-0.00004947,0.00033297,-0.00033623,-0.00021457,-0  
 .03844986,0.07741041,0.07722680,0.00303483,0.00330363,-0.00031508,-0.1  
 2092941,-0.10402143,0.04794894,-0.02108793,-0.03265796,0.01299023,0.00  
 352728,0.00069976,0.00085874,-0.00390539,0.00127609,-0.00261337,0.0094  
 5632,0.01229297,-0.00708955,0.12870965,0.00152472,0.00299205,-0.001999  
 33,-0.10937093,-0.24097584,0.08295366,0.00026742,0.00187991,-0.0021930  
 6,0.00120402,-0.00041286,-0.00032022,0.00053428,0.00122087,0.00193961,  
 -0.01388514,-0.01627813,0.00952706,0.11907468,0.25023850,0.01534173,0.  
 02615902,-0.01403688,0.05332512,0.08460484,-0.08159961,-0.01038519,-0.  
 01264218,0.00272191,0.00200864,-0.00090021,-0.00066978,-0.00314830,0.0  
 0141706,0.00131126,-0.00646701,-0.00800589,0.00304322,-0.05035125,-0.0  
 8880520,0.09213454,-0.32047924,0.00954046,-0.08074257,0.00308105,0.000  
 76497,0.00459613,-0.00121577,0.00138171,0.00001719,0.00122430,-0.00157  
 802,0.00048083,0.00018696,-0.00003026,-0.00027700,0.00036549,-0.000466  
 83,-0.00016519,0.00024191,0.00016615,-0.00007147,0.33926628,0.01027572

,-0.05146960,0.00225161,-0.00052171,0.00108734,0.00007873,0.00017158,-  
 0.00123514,-0.00047827,-0.00033758,0.00059628,0.00037009,0.00029035,-0  
 .00007325,0.00000354,-0.00077295,-0.00012708,-0.00022855,0.00051322,-0  
 .00018258,0.00020147,-0.01038794,0.04891040,-0.07935095,0.00254466,-0.  
 06509610,-0.03392822,-0.00118740,-0.02343653,0.00659737,-0.00198436,-0  
 .00500498,-0.00342131,0.00277236,-0.00113309,-0.00004264,0.00005723,0.  
 00074646,-0.00025353,0.00038011,0.00273001,-0.00006095,0.00017353,0.00  
 167333,0.08430707,-0.00254552,0.07949602,-0.11677230,-0.10871573,0.049  
 91780,0.00004643,0.00348650,-0.00216306,0.00120465,0.00150917,-0.00097  
 529,-0.00007561,-0.00026576,0.00001627,0.00005201,-0.00011862,-0.00003  
 220,-0.00020966,-0.00018963,0.00049576,0.00047951,0.00014759,-0.000809  
 61,-0.01234484,-0.02730562,0.01318338,0.11993501,-0.10944579,-0.239967  
 68,0.08226750,0.00335659,0.00421096,-0.00137480,-0.00072132,-0.0000344  
 9,0.00012086,0.00025217,-0.00009975,0.00013880,0.00024964,0.00005504,0  
 .00023941,0.00033049,0.00057060,0.00010376,-0.00008378,0.00087785,-0.0  
 0135341,0.00247030,0.00190583,-0.00134129,0.11864798,0.25113497,0.0500  
 9019,0.08078833,-0.08697850,0.01371076,0.02513433,-0.01480929,0.003109  
 66,0.00313598,-0.00092701,-0.00064613,-0.00039182,-0.00020147,-0.00080  
 551,-0.00006988,-0.00051040,0.00001520,0.00029395,0.00170403,-0.001233  
 52,-0.00087121,-0.00609920,-0.00429060,-0.00864879,0.00457493,-0.05222  
 930,-0.08969259,0.09742594,-0.10492068,0.10140856,0.04300265,-0.000503  
 39,-0.00235416,-0.00299843,0.00157968,-0.00235002,-0.00149254,0.000314  
 91,0.00035449,0.00063286,0.00000671,-0.00009045,0.00011299,0.00049921,  
 -0.00019896,-0.00063650,-0.00025808,0.00019131,0.00055592,-0.01027553,  
 0.02808958,0.01258900,0.00779179,-0.01502056,-0.00759674,0.10582697,0.  
 10165556,-0.25960900,-0.08397231,-0.00231681,0.00451919,0.00240143,0.0  
 0020548,-0.00015549,-0.00009328,-0.00048986,0.00028014,-0.00028978,-0.  
 00000519,-0.00016623,-0.00004800,0.00008353,0.00095776,0.00136293,-0.0  
 0022023,0.00048569,-0.00031517,-0.00171288,0.00059644,0.00060956,0.012  
 78216,-0.01858688,-0.00972140,-0.11000822,0.27167128,0.04287536,-0.081  
 28727,-0.08312235,0.00826555,-0.02516755,-0.01584839,0.00548689,-0.005  
 13177,-0.00103079,-0.00074397,0.00178650,0.00032615,-0.00003267,0.0000  
 1164,-0.00004346,-0.00109494,-0.00013917,-0.00626514,0.00008554,-0.000  
 11017,0.00170538,-0.00355468,0.00905054,0.00431742,-0.00727607,0.01084  
 921,0.00590636,-0.04410134,0.09016481,0.09437335,0.00038946,0.00059008  
 ,-0.00258774,0.00502907,0.00020019,0.00141483,-0.01996633,-0.00370305,  
 -0.00400556,-0.42706481,-0.02282153,-0.09095804,0.00335515,-0.00102352  
 ,0.00315473,0.00027757,0.00073811,-0.00084909,0.00073131,0.00014590,0.  
 00000141,-0.00005062,-0.00001465,0.00038077,-0.00010697,-0.00003571,-0  
 .00012400,-0.00006158,0.00002647,0.00009033,0.43746777,0.00179330,-0.0  
 0010461,0.00018240,-0.00319354,-0.00243419,0.00522342,0.04989313,-0.00  
 337976,0.01286947,-0.07612271,-0.04676100,-0.01314804,0.00170672,-0.00  
 025438,-0.00201600,0.00034960,-0.00002197,-0.00009554,-0.00017695,0.00  
 015453,-0.00036033,-0.00014768,-0.00000865,0.00052110,0.00002197,-0.00  
 006645,0.00004310,-0.00002155,0.00000711,-0.00002678,0.02589771,0.0528  
 6936,0.00430556,-0.00060958,-0.00020076,-0.00417295,0.00812940,0.01418  
 131,-0.01979781,-0.00033584,-0.00770355,-0.07294791,-0.00017110,-0.047  
 58845,0.00214720,-0.00280872,-0.00638212,-0.00230149,-0.00060561,-0.00  
 132783,-0.00021972,-0.00029467,-0.00018416,-0.00029971,-0.00005483,0.0  
 0113255,-0.00012768,0.00004255,-0.00008538,-0.00006786,-0.00009880,-0.  
 00031854,0.09348236,-0.00319282,0.04847693\\-0.00001007,-0.00000409,0.  
 00003786,0.00000501,-0.00000073,-0.00005823,0.00001441,-0.00001124,0.0  
 0001405,-0.00001330,0.00000492,-0.00000739,0.00000145,0.00000303,0.000  
 00494,-0.00000453,0.00000277,0.00000942,-0.00000534,0.00000013,0.00000  
 748,-0.00000139,0.00000176,-0.00000568,0.00000173,0.00000180,-0.000005

20,0.00000105,-0.00000131,0.00000091,0.00001099,0.00000296,0.00000183\  
\\@

## Structure 27

Zero-point correction= 0.099633 (Hartree/Particle)  
Thermal correction to Energy= 0.104682  
Thermal correction to Enthalpy= 0.105626  
Thermal correction to Gibbs Free Energy= 0.072286  
Sum of electronic and zero-point Energies= -192.732682  
Sum of electronic and thermal Energies= -192.727633  
Sum of electronic and thermal Enthalpies= -192.726689  
Sum of electronic and thermal Free Energies= -192.760028

1\1\ UOFC-OXYGEN\Freq\RMP2-FU6-31G(d)\C3H7O1(1+)\JMCOXON\05-Mar-1996\  
1\#MP2=(FULL) 6-31G\* FREQ, IOP(7/33=1)\\  
\\1,1\C\1,R2\C,2,R3,1,A3\O,1,R4,2,A4,3,D4,0\H,1,R5,2,A5,  
3,D5,0\H,2,R6,3,A6,1,D6,0\H,2,R7,3,A7,1,D7,0\H,3,R8,2,A8,1,D8,0\H,3,R9  
,2,A9,1,D9,0\H,3,R10,2,A10,1,D10,0\H,4,R11,1,A11,2,D11,0\VR2=1.4527833  
5\VR3=1.52113101\VR4=1.27212033\VR5=1.09355045\VR6=1.10459777\VR7=1.1045837  
\VR8=1.0900716\VR9=1.0910124\VR10=1.09101144\VR11=0.98928861\VA3=116.313909  
44\VA4=119.83235074\VA5=121.5994484\VA6=113.13152846\VA7=113.13543444\VA8=1  
08.94220233\VA9=111.3164668\VA10=111.31645208\VA11=114.38568216\VD4=-0.007  
86483\VD5=179.99439435\VD6=-121.91003111\VD7=121.92121493\VD8=180.00066419  
\VD9=-60.7733722\VD10=60.77475651\VD11=-179.99702883\\Version=SGI-G94RevB  
.3\HF=-192.2634925\MP2=-192.8323146\RMSD=2.880e-09\RMSF=9.851e-05\Dipo  
le=-0.9904206,0.0000235,-1.4824629\DipoleDeriv=0.7813453,0.0000497,-0.  
5430176,0.0000354,0.3389552,-0.0000227,-0.3463903,0.0000106,1.3187149,  
-0.1033337,-0.0000068,0.3188103,0.0000467,-0.0967081,-0.0002039,0.2017  
531,-0.0000444,-0.5245336,0.0541505,-0.0000047,0.0569076,-0.0000116,0.  
0316966,0.0000411,0.0070548,0.0000025,0.0030302,-0.576317,-0.0000368,0  
.5834052,-0.0000467,-0.2035958,0.0000867,0.3517157,0.0000341,-0.762450  
4,0.1072997,-0.0000042,0.0151867,-0.0000083,0.1257283,0.0000003,-0.045  
5123,-0.0000008,0.0270569,0.1155651,0.033213,-0.164338,0.0459501,0.125  
7773,0.0302198,-0.0471157,0.0251454,0.1090965,0.115534,-0.0332145,-0.1  
64345,-0.0459664,0.1257824,-0.0301068,-0.0471363,-0.025132,0.1091226,0  
.0615764,0.000001,0.0200421,0.0000023,0.1171075,0.0000001,0.0011107,0.  
0000013,0.0016265,0.0404942,0.0193405,-0.0209894,0.0433029,0.0036677,-  
0.0348448,0.024175,-0.0640553,0.0715469,0.0404931,-0.0193342,-0.020977  
6,-0.0433053,0.0036642,0.03484,0.0241736,0.064054,0.0715596,0.3631925,  
-0.000003,-0.0806841,0.000001,0.4279249,-0.0000096,-0.1238283,-0.00001  
53,0.5752299\Polar=33.7918309,0.0006859,24.6574116,-2.3404356,-0.00036  
56,40.1950613\PG=C01 [X(C3H7O1)]\NImag=0\\0.86293306,0.00007913,0.2235  
4168,-0.04972534,-0.00002182,0.73906254,-0.09006784,-0.00000649,-0.051  
59805,0.56447473,-0.00001161,-0.09165315,0.00001341,0.00003461,0.52531  
761,-0.03154459,0.00000578,-0.26396026,0.01306061,-0.00003471,0.539711  
86,0.00464345,0.00000124,-0.00717708,-0.19198508,-0.00000129,-0.049365  
61,0.53142453,0.00000078,-0.00005018,-0.00000356,-0.00000242,-0.086501  
37,0.00000517,0.,0.62381369,-0.03460504,0.00000118,-0.02942482,-0.0468  
8901,0.00000412,-0.10355652,-0.04952207,-0.00000183,0.59999850,-0.4889  
0984,-0.00005813,0.15186033,-0.01170644,0.00000535,0.02874815,-0.00063  
483,-0.00000075,-0.00324077,0.56839457,-0.00005949,-0.05802160,0.00002  
492,0.00000045,0.01021741,0.00000302,-0.00000119,-0.00338968,-0.000001  
18,0.00006608,0.05490171,0.22024101,0.00003399,-0.24170255,0.05739651,  
0.00000331,-0.03224884,0.00322582,0.00000028,0.00456934,-0.17839969,-0

.00004696,0.70992492,-0.25859368,-0.00001817,-0.12363972,0.00864495,-0.00000105,0.00350473,-0.00014943,-0.00000037,0.00128449,-0.03068023,-0.00000679,-0.00819535,0.27998463,-0.00001722,-0.06874193,-0.00001007,-0.00000336,0.01152295,-0.00000117,0.00000126,0.00405828,0.00000030,-0.00000772,0.02914976,-0.00000079,0.00002537,0.02967495,-0.13870932,-0.0001445,-0.16066650,-0.02772996,-0.00000025,-0.00487829,0.00392076,-0.00000047,-0.00487832,0.03162094,0.00000438,0.01275543,0.12987689,0.0001158,0.15247367,-0.00889579,0.00063371,0.01254361,-0.11999748,0.11724188,0.02887540,-0.01561266,0.02169254,0.00822404,0.00526238,0.00116175,-0.00290599,-0.00003263,-0.00043162,0.00070247,0.13564319,0.00009078,-0.00150803,0.00069623,0.11550803,-0.19603212,-0.05938241,-0.00130390,0.00222857,0.00194694,-0.00234444,-0.00168283,0.00209823,0.00012636,0.00116997,-0.00044056,-0.12514491,0.21917189,0.02222348,-0.03262140,-0.01128267,0.03691384,-0.06227013,-0.06608531,-0.00892610,0.01381023,0.00552935,-0.00098716,0.00060538,-0.00604339,-0.00074160,0.00322954,0.00068952,-0.04187403,0.06462603,0.07386250,-0.00889458,-0.00062891,0.01254264,-0.12005024,-0.11726543,0.02889991,-0.01560989,-0.02168905,0.00822672,0.00526331,-0.00116285,-0.00290652,-0.00003240,0.00043276,0.00070228,0.00598543,0.01400395,-0.00492010,0.13569104,-0.00008275,-0.00150326,-0.00070642,-0.11552962,-0.19600661,0.05940543,0.00130501,0.00223015,-0.00194938,0.00234099,-0.00168142,-0.00209680,-0.00012646,0.00116912,0.00044008,-0.01400890,-0.02425491,0.00990987,0.12516566,0.21913970,0.02222847,0.03261683,-0.01128444,0.03693226,0.06228134,-0.06610203,-0.00892554,-0.01380983,0.00553074,-0.00098826,-0.00060439,-0.00604530,-0.00074061,-0.00322863,0.00068935,-0.00491933,-0.00990584,0.00467957,-0.04189887,-0.06464044,0.07388237,-0.00862274,-0.00000009,-0.00301099,0.00134053,0.00000105,-0.03506987,-0.05560907,-0.00000050,0.04340865,0.00082092,0.00000006,0.00095264,0.00038495,-0.00000021,-0.00180096,0.00164805,0.00024600,0.00021108,0.00164800,-0.00024639,0.00021095,0.06219230,0.00000001,-0.00011382,0.00000003,-0.00000019,-0.00102745,-0.00000026,-0.00000020,-0.05180969,0.00000324,-0.00000002,0.00019132,0.00000003,-0.00000002,0.00021959,-0.00000001,-0.00004419,0.00011778,0.00047472,0.00004401,0.00011793,-0.00047465,0.00000056,0.04960700,-0.00209585,0.000001866,0.000117886,0.000000035,-0.01213101,0.03954244,0.000000320,-0.33758692,-0.00024080,-0.00000003,0.00053043,0.00026514,-0.00000002,-0.00037843,0.00055056,0.00016748,0.00030992,0.00055057,-0.00016762,0.00031011,-0.04065929,-0.00000352,0.35984888,-0.00016598,0.00076055,0.00223274,-0.01764909,0.02478184,0.00687474,-0.12836457,0.11929429,0.03712806,0.00073860,0.00023353,-0.00095022,-0.00001857,-0.00056591,0.00006731,-0.00454639,-0.00071827,-0.00338247,0.00056055,0.00043070,0.00063994,-0.00190526,0.00271667,0.00050331,0.13961634,0.00086173,0.00008956,-0.00083912,-0.00291909,0.00352352,0.00178158,0.12154612,-0.24521901,-0.05949075,-0.00035745,0.00019344,0.00005395,-0.00008015,-0.00017997,0.00013200,-0.00099784,0.00111921,-0.00059947,0.00011358,0.00047926,0.00036016,-0.00193462,0.00131689,0.00134815,-0.13150956,0.25815946,-0.00208082,0.00151264,0.00217351,-0.00945999,0.01539235,0.00192140,0.03865928,-0.06076028,-0.07025155,0.00068112,0.00049634,-0.00067648,0.00003849,-0.00065653,0.00006608,-0.00314001,-0.00006794,-0.00147504,0.00052894,-0.00017984,0.00014237,0.01780045,-0.02907511,-0.00550651,-0.03755738,0.06533807,0.07205094,-0.00016582,-0.00076071,0.00223153,-0.01765008,-0.02478264,0.00687625,-0.12836218,-0.11929445,0.03712474,0.00073835,-0.00023297,-0.00094988,-0.00001865,0.00056572,0.00006716,0.00056099,-0.00043085,0.00064019,-0.00454617,0.00071870,-0.00338294,-0.00190525,-0.00271668,0.00050332,0.01150574,0.01549045,-0.00557156,0.13961436,-0.00086201,0.00008916,0.00083907,0.00291969,0.00352362,-0.00178156,-

0.12154704,-0.24522563,0.05948791,0.00035744,0.00019353,-0.00005359,0.00008019,-0.00017996,-0.00013201,-0.00011339,0.00047971,-0.00036019,0.00099818,0.00111917,0.00059948,0.00193418,0.00131622,-0.00134797,-0.01548993,-0.01947552,0.00812316,0.13150945,0.25816645,-0.00208018,-0.00151242,0.00217263,-0.00945980,-0.01539293,0.00192248,0.03865609,0.06075729,-0.07024907,0.00068080,-0.00049617,-0.00067714,0.00003837,0.00065641,0.00006594,0.00052913,0.00017984,0.00014251,-0.00313966,0.00006846,-0.00147490,0.01780018,0.02907551,-0.00550596,-0.00557183,-0.00812380,0.00163668,-0.03755455,-0.06533509,0.07204826,-0.00326026,-0.00000214,0.05374034,-0.00535397,-0.00000271,-0.00085972,0.00025972,-0.00000009,-0.00113979,-0.04928681,0.00000142,-0.08750833,0.00051106,0.00000093,0.00128243,-0.00001508,-0.00003275,0.00084288,-0.00001505,0.00003307,0.00084393,0.00000757,0.00000004,-0.00009826,0.00022862,-0.00021315,0.0010149,0.00022870,0.00021324,0.00010144,0.05669550,0.00000067,-0.00212844,0.00000732,-0.00000162,0.01711559,-0.00000086,0.,-0.00013513,-0.0000055,-0.00000135,-0.03007165,0.00000837,0.00000109,-0.00786276,-0.0000029,0.00001096,-0.00080924,0.00319541,-0.00001189,-0.00080912,-0.00319401,-0.00000005,0.00006423,-0.00000001,0.00006609,-0.00000684,-0.00012285,-0.00006601,-0.00000674,0.00012290,0.00000213,0.02465009,-0.00385180,-0.00000032,-0.02510611,-0.00034527,0.00000314,0.00540651,-0.00008800,-0.00000020,0.00031928,-0.02973465,0.00001471,-0.44038642,-0.00169083,-0.00000064,0.00406156,0.00141415,0.00008201,-0.00032695,0.00141409,-0.00008334,-0.00032783,0.00015716,0.00000002,0.00009082,0.00001580,0.00003923,-0.00008141,0.00001575,-0.00003920,-0.00008143,0.03269361,-0.00001541,0.45643197\0.00025774,0.00000051,-0.00010275,-0.00022835,-0.00000621,0.00013742,-0.00004435,0.00000165,-0.00009563,-0.00008303,-0.00000015,0.00027033,-0.00005854,0.00000007,0.00003457,0.00007850,0.00003833,0.00000543,0.00007772,-0.00003479,0.00000607,-0.00003200,-0.00000001,0.00000937,0.00001053,-0.00003383,-0.00001276,0.00001025,0.00003387,-0.00001229,0.00001155,0.00000055,-0.00023975\\@

## Structure 20

|                                              | 1<br>?A                     | 2<br>?A  | 3<br>?A  |
|----------------------------------------------|-----------------------------|----------|----------|
| Frequencies --                               | -970.7313                   | 227.5551 | 362.8248 |
| Zero-point correction=                       | 0.098068 (Hartree/Particle) |          |          |
| Thermal correction to Energy=                | 0.102603                    |          |          |
| Thermal correction to Enthalpy=              | 0.103548                    |          |          |
| Thermal correction to Gibbs Free Energy=     | 0.071544                    |          |          |
| Sum of electronic and zero-point Energies=   | -192.677689                 |          |          |
| Sum of electronic and thermal Energies=      | -192.673153                 |          |          |
| Sum of electronic and thermal Enthalpies=    | -192.672209                 |          |          |
| Sum of electronic and thermal Free Energies= | -192.704213                 |          |          |

1\1\ UOFC-OXYGEN\Freq\RMP2-FU\6-31G(d)\C3H7O1(1+)\JMCXON\09-Apr-1996\0\#MP2=(FULL) 6-31G\* FREQ IOP(7/33=1) GEOM=CHECKPOINT\\1,1\C,-0.4476726399,-0.3440242586,-1.4591264752\C,-0.4484408025,-0.341638325,0.0264804744\C,0.8090476274,-0.3478361141,0.8371275502\O,0.0776182282,0.8983398301,0.6811586518\H,1.7628227722,-0.3470219941,0.3188657028\H,0.7929392793,-0.7277394956,1.8534747177\H,0.0709299321,1.8554480602,0.9070899259\H,-1.3515522894,-0.6583449909,0.541914178\H,-0.5680438934,-1.3826399487,-1.7856478298\H,0.486692321,0.04682555,-1.863846628\H,-1.2923390575,0.22774636

42,-1.8480085776\\Version=SGI-G94RevB.3\\HF=-192.2046202\\MP2=-192.77575  
63\\RMSD=7.946e-09\\RMSF=2.203e-05\\Dipole=0.1688382,0.4432783,0.6394273\\  
DipoleDeriv=-0.0458098,-0.0233526,-0.0411001,-0.0181027,-0.0817164,-0.  
0530127,-0.0310522,-0.0771507,-0.1881121,0.3334332,0.0854482,0.0849321  
,0.2568482,0.7609022,0.4085031,0.1517193,0.2693988,0.7354809,0.3144689  
,-0.109522,0.0005433,-0.2962548,0.5804119,-0.1343145,-0.0604417,0.0048  
529,0.2287483,-0.3887324,0.0346746,0.0230117,0.0164917,-1.4975747,-0.3  
890468,0.0326718,-0.2713746,-0.6136131,0.0954795,0.0183869,0.004641,-0.  
0069647,0.0877812,0.0368545,0.023043,0.023862,0.0695724,0.0735636,0.0  
205017,0.0074039,0.0174716,0.1090139,-0.0216949,0.0037367,0.0156525,0.  
0769931,0.3530846,-0.0149891,-0.1225336,0.0140831,0.7128467,0.0903612,  
-0.0899459,0.0535885,0.4443731,0.0735421,-0.0196807,-0.0035919,0.01156  
35,0.0882338,-0.0310149,0.0049586,-0.0089359,0.0167679,0.1336072,-0.00  
39429,0.0166951,-0.0042075,0.0513514,0.0297531,-0.0070571,0.0155412,0.  
089435,-0.001703,-0.0389255,0.0207927,-0.0420279,0.0947218,0.0308835,-  
0.0289974,-0.0104066,0.0742126,0.0590662,0.0514012,0.0092058,0.0510995  
,0.0940283,0.0327285,0.0013649,-0.0150282,0.0661418\\Polar=31.0043649,0  
.136641,29.3799395,3.464584,1.3298753,33.376426\\PG=C01 [X(C3H7O1)]\\NIm  
ag=1\\0.63557022,0.00660385,0.59839187,-0.00833409,-0.02301167,0.53448  
855,-0.09983088,0.00695071,0.00867903,0.65001160,-0.00244152,-0.072823  
60,0.01740287,0.11372241,0.26094975,0.01381063,0.03116033,-0.25481378,  
-0.01964897,-0.04615242,0.60642600,0.00360684,-0.00420443,-0.00035632,  
-0.22030053,-0.02371080,-0.09140390,0.66786134,0.00031566,-0.00794328,  
-0.00226817,0.00384395,0.01818833,0.02882253,-0.05523792,0.30739382,-0  
.02804807,0.01520311,-0.01050229,-0.08256452,0.00532198,-0.13172004,-0  
.04368124,-0.13583918,0.65686402,0.00024527,-0.00982941,-0.00453392,-0  
.05064978,-0.03480895,-0.02601818,-0.08997417,0.06927420,-0.01911856,0  
.15718181,-0.00359247,-0.01245041,-0.01102068,-0.05891064,-0.11299971,  
-0.04462022,0.10733691,-0.18689842,0.03349371,-0.05978597,0.78899147,-  
0.00652945,-0.03880330,-0.00983115,-0.03265984,-0.03821117,-0.04272678  
,-0.00907413,0.00499586,-0.03640318,0.11123371,0.16036694,0.06890954,0  
.00143439,-0.00098103,0.00088890,-0.01527306,0.00166031,0.01150672,-0.  
28813847,-0.00145260,0.13161276,-0.00508271,0.00087415,-0.00166865,0.3  
0124523,0.00146684,0.00075380,0.00067554,-0.01033664,-0.00613107,0.009  
82257,-0.01775566,-0.04813423,0.00724753,0.03490834,-0.00839884,-0.009  
48997,-0.00115812,0.05207292,0.00001076,-0.00115696,0.00145250,-0.0183  
1068,0.00039401,0.01168377,0.13641829,0.00836679,-0.13686099,-0.004817  
65,-0.00103730,0.00204349,-0.13680816,-0.00825053,0.13012400,-0.003000  
87,0.00169706,-0.00012051,0.00249102,0.01042283,-0.02037665,-0.0601492  
3,-0.00312440,0.02019931,-0.00378286,0.00591554,-0.01280406,0.00543173  
,-0.00983999,0.02352205,0.05744072,-0.00294183,0.00220591,-0.00019392,  
0.00701382,0.00056270,-0.01574926,-0.00911400,-0.08111945,0.09066586,0  
.00899473,-0.01609592,0.02695498,-0.00056040,0.00557185,-0.00084681,-0  
.00329500,0.08809291,-0.00182837,0.00115759,-0.00006069,0.00485651,0.0  
0366282,-0.00957971,0.01013576,0.10361025,-0.33516028,-0.00039088,-0.0  
0481308,0.00976056,-0.00319409,0.00336975,-0.00580567,-0.00986767,-0.1  
0647429,0.33867081,0.00019764,-0.00117404,-0.00102623,-0.00333400,0.01  
421180,0.01663842,0.00315525,-0.00622614,0.01023702,-0.00873803,0.0021  
3294,-0.04562412,0.00059036,0.00411775,0.00171807,0.00033226,-0.000294  
86,-0.00000047,0.00637756,-0.00069486,0.00360829,-0.00090986,0.0016067  
0,-0.00955799,0.00296139,-0.00702467,-0.00508406,-0.00184936,0.0153254  
8,-0.44223596,-0.11112292,-0.00051863,0.00261856,0.00026265,-0.0008451  
3,0.00096668,-0.00009163,-0.00869345,0.44886081,0.00064799,-0.00615775  
,-0.00160844,0.01126562,0.01291456,-0.00671922,0.01022693,-0.00191010,  
-0.00903243,-0.04202391,-0.12104189,0.00690839,-0.00018218,-0.00186654



, -0.00066082, 0.00070950, 0.00532928, 0.00143549, 0.01926601, 0.10899331, 0.01097764, 0.00632021, 0.00204824, -0.00276551, -0.26610763, -0.07577719, 0.11967388, -0.01750570, -0.00767316, 0.01139138, 0.00047710, 0.00262565, -0.00236717, -0.00073103, -0.00163827, -0.00206919, 0.00082590, 0.00046044, 0.00026290, 0.00123955, 0.00042297, -0.00026490, 0.27416385, 0.00235593, 0.00630065, -0.00049792, -0.06117478, -0.07051901, 0.04582928, 0.01204477, 0.00145934, -0.01136196, -0.02679192, -0.01778708, 0.00057103, 0.00168922, 0.00167874, 0.00172082, -0.00100185, 0.00024091, -0.00005935, -0.00526946, 0.00110125, 0.00302481, 0.07962733, 0.07571555, 0.02607619, 0.00998538, -0.00938053, 0.13045980, 0.04355348, -0.13124936, -0.01571670, -0.00732903, 0.00592155, -0.01424015, -0.00637873, 0.00214940, -0.00116158, -0.00156860, -0.00142750, -0.00013826, 0.00098131, 0.00092587, -0.00035134, 0.00064898, 0.00058719, -0.12316816, -0.03917555, 0.13576472, -0.05005769, -0.02980397, -0.00681796, -0.00240388, -0.00131981, -0.00171639, -0.00022518, -0.00041098, 0.00014916, 0.00053513, 0.00166713, -0.00046231, -0.00001450, -0.00014368, -0.00009227, 0.0009307, -0.00005110, 0.00001646, 0.00013391, 0.00017322, 0.00013444, -0.00000166, -0.00040120, -0.00014765, 0.05020667, -0.03002688, -0.30126276, -0.07725618, -0.00076974, -0.00362061, -0.00334509, -0.00050167, 0.00021468, -0.00083710, 0.00133800, 0.00525450, 0.00249742, 0.00009505, -0.00011267, -0.00008835, 0.00002672, -0.00008418, 0.00001047, 0.00062162, -0.00011953, 0.00094855, -0.00023534, 0.00031132, -0.00042712, 0.03203803, 0.32283959, -0.00771885, -0.07834494, -0.07536487, -0.00272623, -0.03351946, -0.00753030, -0.00050705, -0.00174365, 0.00147201, -0.00158268, -0.00285468, -0.00718602, -0.00026088, 0.00024719, -0.00016594, 0.00008671, 0.00010654, 0.00001097, -0.00053512, 0.00142396, -0.00173086, 0.00052341, 0.00138999, 0.00100399, 0.01013498, 0.08737521, 0.08012307, -0.26748533, -0.08955154, 0.08946506, 0.00254381, 0.00201941, -0.00162171, 0.00138788, -0.00005982, -0.00080708, 0.00003774, 0.00087456, -0.00010769, 0.00014392, 0.00028366, 0.00014512, -0.00000368, -0.00004525, -0.00005981, -0.00009041, -0.00009234, 0.00031365, 0.00093053, -0.00046978, -0.00124718, -0.00157388, 0.00117054, 0.00033365, 0.28181780, -0.08851826, -0.08767078, 0.04063374, 0.00138003, -0.00281394, -0.00420021, -0.00058703, 0.00089525, 0.00021299, 0.00116189, 0.00046516, 0.00071127, 0.00017906, 0.00009301, 0.00047422, 0.00015821, -0.00009324, -0.00008662, 0.00046186, -0.00005606, -0.00026510, -0.00002570, 0.00156869, -0.00059771, -0.02698244, -0.00850336, 0.01318829, 0.09700175, 0.08853966, 0.08566718, 0.03711431, -0.08890636, 0.03283508, 0.01487088, -0.01770076, 0.00181766, 0.00112294, 0.00130712, -0.00007407, -0.00112073, 0.00368157, -0.00090617, -0.00019404, -0.00033844, -0.00012508, 0.00027531, 0.00025576, -0.00003679, -0.00019245, -0.00048621, -0.00165745, -0.00067440, -0.00541573, -0.01075852, -0.00314094, 0.00467649, -0.09619715, -0.04170924, 0.09759282, -0.22699980, 0.11824455, -0.07507845, 0.00285335, -0.00397849, -0.00084384, 0.00028198, 0.00075121, 0.00062983, -0.00024950, 0.00086219, 0.00006371, 0.00039414, 0.00009577, 0.00028366, 0.00032194, -0.00016656, 0.00006966, 0.00013592, 0.00034070, -0.00009315, 0.00038888, -0.00060827, -0.00036497, 0.00330799, -0.00375633, 0.00225206, -0.01770838, 0.01577062, -0.01056468, 0.23727348, 0.11747354, -0.12910967, 0.05644624, -0.00332583, -0.00123485, -0.00452891, -0.00124551, 0.00102802, -0.00225759, 0.00021360, 0.00215521, 0.00152989, 0.00017297, -0.00001208, 0.00016146, -0.00011401, -0.00024818, -0.00028592, 0.00011198, -0.00010199, 0.00003087, 0.00016504, -0.00007035, 0.00030758, 0.02523481, -0.01491698, 0.01273155, -0.01113119, 0.00757562, -0.00635164, -0.12755539, 0.13493526, -0.07375392, 0.05285391, -0.08547295, -0.03218580, 0.01976244, -0.01606982, 0.00214069, 0.00217176, -0.00588549, 0.00156629, -0.00097335, 0.00269419, 0.00017333, 0.00000711, -0.00004439, -0.00108533, -0.00104901, -0.00045312, -0.00028546, -0.00012407, 0.00032928, 0.00044081, -0.00076676, 0.00112038, 0.00956007, -0.00573687, 0.00469146, 0.00978314, -0.00836163, 0.00533374, 0.0836461

7,-0.05778354,0.09375673\0.00000945,0.00001117,-0.00000745,0.00000825  
 ,0.00003384,-0.00002472,0.00005493,0.00002051,0.00002461,-0.00006311,0  
 .00000158,0.00003241,-0.00001022,-0.00001163,-0.00001434,-0.00003244,-  
 0.00001218,-0.00000674,0.00002868,-0.00000421,-0.00002257,0.00001251,-  
 0.00001215,0.00001266,0.00000434,0.00000256,-0.00001512,0.00000224,-0.  
 00002142,0.00000300,-0.00001464,-0.00000808,0.00001826\ \@

## Structure 22

|                | 1<br>?A   | 2<br>?A  | 3<br>?A  |
|----------------|-----------|----------|----------|
| Frequencies -- | -379.7971 | 113.5852 | 266.5041 |

|                                              |                             |
|----------------------------------------------|-----------------------------|
| Zero-point correction=                       | 0.096066 (Hartree/Particle) |
| Thermal correction to Energy=                | 0.101108                    |
| Thermal correction to Enthalpy=              | 0.102052                    |
| Thermal correction to Gibbs Free Energy=     | 0.068666                    |
| Sum of electronic and zero-point Energies=   | -192.671516                 |
| Sum of electronic and thermal Energies=      | -192.666474                 |
| Sum of electronic and thermal Enthalpies=    | -192.665530                 |
| Sum of electronic and thermal Free Energies= | -192.698916                 |

1\1\ UOFC-OXYGEN\Freq\RMP2-FU\6-31G(d)\C3H7O1(1+)\JMCOXON\29-Feb-1996\  
 1\#MP2=(FULL) 6-31G\* FREQ, IOP(7/33=1)\ \1,1\  
 C\1,R2\C,2,R3,1,A3\O,1,R4,2,A4,3,D4,0\H,2,R5,3,A5,1,D5,0\H,1,R6,2,A6  
 ,3,D6,0\H,1,R7,2,A7,3,D7,0\H,4,R8,2,A8,3,D8,0\H,3,R9,2,A9,1,D9,0\H,3,R  
 10,2,A10,1,D10,0\H,3,R11,2,A11,1,D11,0\R2=1.48501982\R3=1.43337788\R4  
 =1.42376768\R5=1.09351421\R6=1.09064622\R7=1.09918853\R8=0.97595184\R9  
 =1.08700674\R10=1.10353686\R11=1.10878615\A3=123.72002016\A4=100.36992  
 823\A5=116.95510046\A6=112.52246158\A7=110.22022212\A8=118.54763267\A9  
 =115.70372806\A10=108.11320381\A11=106.62794465\D4=-58.54474006\D5=185  
 .43511792\D6=185.30127264\D7=62.9505171\D8=45.64907118\D9=-9.19046059\  
 D10=-136.94532011\D11=114.0931027\Version=SGI-G94RevB.3\HF=-192.20859  
 63\MP2=-192.7675821\RMSD=4.999e-09\RMSF=1.395e-05\Dipole=-0.0186708,-0  
 .9599378,0.8235819\DipoleDeriv=0.305734,0.1148088,0.1607822,0.1223381,  
 0.2769016,0.0085625,0.0209349,-0.1340252,0.027336,0.6135098,0.065381,0  
 .2782484,-0.0024165,0.3109787,-0.0579729,0.195038,-0.0816674,1.1482348  
 ,-0.2448975,-0.0519992,-0.3560726,-0.1529606,-0.2308592,-0.2511655,-0.  
 4580836,0.0189327,-0.7974192,-0.4755703,-0.2963626,0.1286143,-0.151255  
 3,-0.417431,0.1240852,0.0032505,0.1670116,-0.7540242,0.1015465,0.00255  
 84,-0.0139099,0.0170153,0.1544847,-0.0234634,-0.010709,0.0081965,0.082  
 8087,0.0328674,-0.0205144,0.0009239,-0.0057407,0.0890974,0.0180541,0.0  
 023425,0.0098453,0.0906956,0.0749501,0.0342829,0.0026929,0.0074831,0.0  
 587559,0.0580185,-0.0049663,0.0283401,0.1318657,0.3234787,0.1046461,-0  
 .1083854,0.0525858,0.2497648,-0.0150645,-0.027247,-0.0090942,0.3724997  
 ,0.0986661,0.0084803,0.0110462,0.0188827,0.1228507,0.0145949,0.0595131  
 ,-0.0124841,0.0709049,0.0664488,-0.0220385,-0.018701,0.0073446,0.19191  
 54,0.0484423,0.1175189,-0.0058583,0.3159905,0.1032665,0.0607573,-0.085  
 2389,0.0867235,0.1935409,0.0759087,0.1024079,0.010803,0.3111074\Polar=  
 33.6633224,1.3606908,27.3506543,2.090399,-2.4655804,41.5996903\PG=C01  
 [X(C3H7O1)]\NImag=1\0.63976411,-0.06811008,0.47942642,0.06237124,0.04  
 316274,0.49894258,-0.09886033,0.02507135,-0.00892131,0.68228506,0.0215  
 0078,-0.05600310,-0.02214845,-0.02830710,0.24733431,-0.03303169,-0.025  
 71556,-0.23654602,-0.00618296,0.03027700,0.57643910,0.00973997,0.00558  
 265,-0.00151644,-0.27971225,0.00273045,-0.09118220,0.66005536,-0.01578

417,0.01958624,0.00107915,0.01602787,-0.07308525,0.00261599,-0.0298016  
 5,0.45218710,-0.01957549,0.00195148,-0.01536388,-0.07912527,-0.0036293  
 9,-0.13049748,-0.05856307,-0.00321744,0.54817093,-0.13565691,-0.118738  
 37,0.00998686,-0.00993007,-0.01213385,0.00959415,0.00329449,0.01316615  
 ,0.00224194,0.54187527,-0.03417261,-0.18474420,0.00070761,-0.01841325,  
 -0.03153083,0.02851296,0.00061235,0.00853367,-0.00069187,0.01501761,0.  
 30763348,0.03404640,0.05886493,-0.05201493,0.01701633,0.02714902,-0.00  
 578174,-0.00437027,-0.00056232,-0.00980594,-0.20802527,-0.00734493,0.1  
 2927129,0.00659341,0.00125878,-0.00207261,-0.28091503,0.02045420,0.118  
 92761,-0.01806366,0.00337998,0.01478529,0.00126644,0.00041837,-0.00086  
 998,0.29019272,0.00457829,0.03105527,0.01734304,0.01890349,-0.07552281  
 ,-0.01894646,-0.00398692,0.00719740,0.00188560,0.00691206,0.00104699,-  
 0.01120829,-0.02494859,0.02639017,0.02331551,-0.00855825,-0.00650708,0.  
 12450881,-0.01023166,-0.13567289,-0.02052352,0.00239725,0.01387101,0.  
 00086973,0.00253783,-0.00171329,-0.12602050,0.01391450,0.13394369,-0.2  
 9537754,0.03326594,-0.10350601,0.00610455,-0.00080700,0.00533166,0.000  
 22086,0.00192709,0.00102354,-0.01693508,-0.00798063,0.00066959,0.00068  
 767,-0.00122506,0.00005893,0.31572506,0.03770626,-0.05507941,0.0126147  
 5,0.00169775,-0.00022069,-0.00166374,-0.00042514,0.00145552,-0.0002843  
 0,-0.03505320,-0.00360406,-0.00476729,-0.00007993,-0.00070680,0.000288  
 00,-0.02381930,0.06272207,-0.09963624,0.01112697,-0.09443136,-0.036073  
 00,0.00776014,-0.02048832,0.00289920,-0.00238156,-0.00354203,0.0142421  
 3,0.00025662,0.00605622,-0.00010149,-0.00110772,0.00134751,0.10534277,  
 -0.01557335,0.10464327,-0.10750835,0.10747038,0.04339951,-0.00170763,-  
 0.00008209,0.00032450,0.00065227,0.00069193,-0.00092899,0.00506919,-0.  
 02737058,-0.00616714,0.00040616,-0.00079703,0.00029296,-0.01006655,0.0  
 2400510,0.01222483,0.10981307,0.09769483,-0.21649355,-0.06762088,-0.00  
 241110,0.00076907,-0.00643615,0.00050975,0.00133513,0.00195599,0.00615  
 732,-0.03031669,-0.00950638,-0.00089568,-0.00415262,0.00071860,0.00095  
 018,-0.00078304,-0.00237885,-0.10380742,0.24743787,0.04198753,-0.08855  
 761,-0.09036862,0.02005659,-0.03002788,-0.01385835,0.00082074,0.006128  
 26,-0.00002016,-0.00634768,0.01254205,0.00766964,-0.00059929,0.0036752  
 7,-0.00411207,-0.00628606,0.01209250,0.00735382,-0.04830971,0.08615588  
 ,0.08865018,-0.01579080,0.01606029,0.00164709,0.00017389,-0.00151214,0.  
 00705157,-0.00116840,-0.00165852,-0.00338404,-0.39218338,0.07195381,0.  
 16781796,-0.00022482,-0.00185639,-0.00010694,-0.00075357,-0.00361843,  
 0.00184884,0.00363018,0.00160733,-0.00023841,0.40704356,-0.04420754,-0.  
 00806938,0.01753739,-0.00280901,-0.00273950,-0.00100883,0.00018263,0.  
 00037243,-0.00016412,0.13117787,-0.06541455,-0.05729498,0.00025888,0.0  
 0204070,0.00032016,-0.00228813,-0.00377103,0.00206198,-0.00046880,0.00  
 243922,-0.00043437,-0.08256934,0.07551362,-0.00042020,0.00507247,-0.00  
 423594,0.00433017,-0.00118932,0.00080985,-0.00010414,-0.00164929,-0.00  
 184186,0.17752687,-0.03585474,-0.07723509,-0.00027739,-0.00204506,-0.0  
 0031584,-0.00306632,-0.00304388,0.00051215,-0.00112524,-0.00182879,0.0  
 0320837,-0.17511749,0.03819965,0.07960803,0.00124834,-0.00135556,0.001  
 00097,-0.02510278,0.00416002,0.01478929,-0.26697420,0.03828272,0.12777  
 462,0.00125527,-0.00011039,0.00085236,-0.00159650,0.00055247,-0.003391  
 90,0.00006816,-0.00029112,0.00037702,-0.00002955,-0.00017919,-0.000834  
 23,0.00028915,0.00033018,-0.00086122,0.28595504,0.00064882,-0.00287131  
 ,-0.00098876,-0.00321649,-0.00168633,-0.00016764,0.03966464,-0.0563881  
 7,-0.01984217,-0.00272624,-0.00034670,0.00051791,0.00000739,0.00733803  
 ,-0.00081115,-0.00004430,-0.00016896,0.00011003,0.00021755,-0.00008431  
 ,-0.00059323,0.00058802,-0.00016904,0.00135778,-0.03979510,0.05247491,  
 0.00032551,0.00101811,0.00067920,-0.02313333,0.00460971,0.01645288,0.1  
 3218890,-0.02158789,-0.13532950,0.00062174,-0.00038808,-0.00066500,-0.

00357037,-0.00192693,-0.00246487,0.00007032,-0.00007852,0.00023338,-0.00004022,-0.00027976,0.00004539,-0.00051457,0.00086980,-0.00091344,-0.13601348,0.02410992,0.13786631,-0.00026427,-0.00445582,-0.00219237,0.00571381,0.01985368,-0.01670447,-0.05943409,-0.01171312,0.02356845,-0.00009470,-0.00188265,0.00099967,0.00080905,-0.00087805,0.00054238,-0.00012787,-0.00002193,-0.00022678,-0.00063545,0.00053354,-0.00141352,-0.00026565,0.00005120,-0.00056724,0.00130256,-0.01809171,0.01696068,0.05166449,-0.00037826,-0.00265108,-0.00087964,-0.00426833,-0.00366294,-0.00601349,-0.01360002,-0.13851680,0.13644548,-0.00108546,-0.00009006,0.00114802,0.00041334,0.00215320,0.00002429,-0.00008040,0.00002762,-0.00015230,0.00013432,-0.00002722,-0.00049224,0.00020436,-0.00014325,0.00034833,-0.00032947,0.00402703,-0.00743374,0.02015101,0.16241086,-0.00303940,0.00083144,0.00008029,-0.00490883,0.01313037,-0.02716639,0.03586665,0.13901575,-0.18214167,-0.00200448,-0.00101052,0.00179489,-0.00026935,-0.00295310,0.00106968,-0.00003294,0.00003941,-0.00072554,0.00000781,-0.00055860,0.00025064,0.00067411,-0.00003358,0.00055627,-0.00148004,0.00791831,-0.00842459,-0.02579007,-0.14511503,0.20763524,-0.00388761,0.00395043,-0.00019695,0.00195078,-0.02585694,-0.00891747,-0.04861036,-0.01451828,-0.00781699,0.00203947,0.00192797,-0.00196965,0.00084457,0.00274572,0.00045454,0.00045432,-0.00010005,-0.00089729,0.00037665,-0.00015957,0.00116404,-0.00075016,0.00034207,-0.00031780,0.00358450,0.02274741,0.01310483,0.00133211,-0.00116109,0.00097656,0.04266571,0.00052368,-0.00415591,-0.00080695,-0.00227519,-0.00365195,-0.00145409,-0.00146873,-0.22267728,-0.11440927,-0.00269390,-0.00116705,0.00300430,-0.00026674,0.00316046,-0.00059958,0.00010162,0.00012876,0.00027804,0.00000664,-0.00012386,-0.00048862,0.00080100,-0.00005923,0.00063284,-0.00126456,-0.00212514,0.00108740,-0.00354615,-0.02352738,-0.01126444,0.01008234,0.25419857,-0.00634318,0.00080328,-0.00023425,-0.00756719,-0.01569954,-0.02369064,0.00448415,-0.12183791,-0.08349942,0.00129401,0.00073307,0.00242394,0.00006807,0.00136914,0.00055415,0.00039452,0.00037642,-0.00095910,0.00032170,-0.00022108,0.00118115,0.00032186,-0.00005310,-0.00015250,-0.00221338,-0.01161100,-0.00747977,0.00482326,0.02212034,0.00707119,0.00441617,0.12402038,0.10478524,0.00001846,0.00001240,0.00000996,-0.00001245,-0.00003606,0.00002742,0.00001914,0.00002524,-0.00003781,-0.00000635,-0.00000933,-0.00000144,0.00000046,0.00000444,0.00000014,0.00000349,0.00001073,-0.00000650,-0.00000055,0.00000061,-0.00000034,-0.00000576,-0.00000054,-0.00001315,0.00000126,-0.00000012,0.000001021,-0.00001658,0.00000156,0.00000922,-0.00000112,-0.00000892,0.00000830\\@

### Structure 23

|                                              |                             |          |
|----------------------------------------------|-----------------------------|----------|
| 1                                            | 2                           | 3        |
| ?A                                           | ?A                          | ?A       |
| Frequencies --                               | -240.0595                   | 105.0590 |
|                                              |                             | 209.7472 |
| Zero-point correction=                       | 0.095411 (Hartree/Particle) |          |
| Thermal correction to Energy=                | 0.100651                    |          |
| Thermal correction to Enthalpy=              | 0.101595                    |          |
| Thermal correction to Gibbs Free Energy=     | 0.067769                    |          |
| Sum of electronic and zero-point Energies=   | -192.674593                 |          |
| Sum of electronic and thermal Energies=      | -192.669354                 |          |
| Sum of electronic and thermal Enthalpies=    | -192.668410                 |          |
| Sum of electronic and thermal Free Energies= | -192.702236                 |          |

1\1\ UOFC-OXYGEN\Freq\RMP2-FU6-31G(d)\C3H7O1(1+)\JMCOXON\12-Apr-1996\  
 0\#MP2=(FULL) 6-31G\* FREQ IOP(7/33=1)\\\1  
 ,1\C,-1.4887145715,-0.0094456473,-1.0243496522\C,-0.1124609515,-0.1391  
 468472,-0.6668337893\C,0.4217006891,-0.5338796532,0.6523434691\O,1.288  
 5980122,0.5699376471,0.9029343458\H,-0.3630561637,-0.6723219829,1.4017  
 712164\H,0.98913493,-1.4729074732,0.5595835367\H,0.6525890628,0.197796  
 9606,-1.3689045102\H,-1.6770787554,-0.0604093193,-2.0997818337\H,-2.18  
 88409581,-0.575380539,-0.4093615176\H,-1.6305639814,1.0761284505,-0.77  
 41116564\H,0.9858807717,1.0424256124,1.7003698327\\Version=SGI-G94RevB  
 .3\HF=-192.2111597\MP2=-192.7700047\RMSD=5.881e-09\RMSF=4.120e-06\Dipo  
 le=-1.1562413,-0.1176592,-0.4037196\DipoleDeriv=-0.616666,0.2662094,-0  
 .213224,0.6716817,-0.2673804,0.244055,-0.0616327,0.0407964,-0.1427148,  
 1.0413177,-0.2049642,0.4334337,-0.1071372,0.3747999,0.0014854,0.373370  
 3,-0.1145187,0.6111972,0.1844353,0.2268421,-0.0391993,0.0141305,0.2440  
 866,0.0476928,0.0026494,0.1909626,0.1608357,-0.4331324,-0.17465,-0.166  
 7943,-0.1021138,-0.5956206,-0.0962808,-0.3361915,-0.1344723,-0.640155,  
 -0.0066365,-0.0475231,0.0275785,-0.0340917,0.0739806,-0.0512347,0.0019  
 338,-0.0181112,0.0631135,0.1099391,0.0071463,0.012795,-0.0433484,0.092  
 081,-0.0721561,0.003766,-0.0136129,0.0962612,0.1101391,0.0116277,-0.01  
 96608,0.0030907,0.0956109,-0.0124831,-0.02651,-0.0146304,0.1156705,0.1  
 226721,-0.0053533,0.0376524,-0.1268029,0.2047989,-0.0384931,0.0610328,  
 0.0065566,0.1578852,0.1627099,0.0052128,-0.0113815,-0.0755196,0.149996  
 7,0.0032854,-0.044665,0.044152,0.0525628,0.1000019,-0.0745831,-0.06477  
 98,-0.246385,0.2450015,-0.0997903,-0.0528531,-0.029665,0.1821568,0.225  
 2198,-0.0099646,0.0035802,0.0464956,0.382645,0.0739194,0.0791001,0.042  
 543,0.3431867\Polar=37.6895243,-0.0462898,28.8221527,5.8862355,-0.3032  
 089,34.2708096\PG=C01 [X(C3H7O1)]\NImag=1\0.61239728,0.09134493,0.429  
 67543,0.00102486,-0.05521803,0.62412926,-0.31760014,-0.03285838,-0.057  
 47142,0.66879378,-0.00418220,-0.07523747,0.00710484,0.03207092,0.30013  
 271,-0.04644922,0.00494196,-0.12344483,-0.02741758,-0.12233783,0.56427  
 336,-0.00733978,0.00431833,-0.03143101,-0.09598582,0.02703777,-0.01516  
 394,0.53692221,0.00037927,0.03605175,0.03415093,0.04176120,-0.07568944  
 ,0.05105404,-0.03139577,0.48194038,-0.00512396,-0.00452700,0.00150416,  
 -0.02679748,0.06765207,-0.22368206,-0.10662117,-0.01856614,0.58366808,  
 -0.00065720,0.00576400,0.00200235,-0.02124825,-0.00962391,-0.02353601,  
 -0.11631162,-0.09715589,0.02623467,0.21852444,0.00124610,0.00249066,-0  
 .00154194,-0.02328419,-0.02085682,-0.02284467,-0.09314783,-0.16194704,  
 -0.01931290,0.07634612,0.34103507,-0.00479085,0.01987097,0.00589026,-0  
 .01682329,-0.03032474,-0.00862555,-0.01471379,-0.08885237,-0.09813986,  
 -0.12259825,0.26871044,0.42309326,0.00152509,0.00055761,-0.00037439,0.  
 01253800,0.00200189,-0.01525843,-0.19558184,-0.02147147,0.13832566,-0.  
 01528016,-0.00900950,0.00884034,0.20761416,-0.00019074,-0.00177225,-0.  
 00221848,-0.00415751,-0.00299173,0.00930630,-0.01793553,-0.05416116,0.  
 01192839,-0.02207516,-0.01104516,0.01736003,0.02754449,0.06186189,0.00  
 058084,0.00118268,0.00337841,0.02390654,0.00182043,-0.02479567,0.13692  
 693,0.01696794,-0.18879711,-0.01206982,-0.00341403,0.01012577,-0.14557  
 913,-0.02028770,0.19963588,0.00038182,-0.00156133,-0.00343807,-0.00896  
 754,0.01147988,0.00133903,-0.12802251,0.13191731,0.01473279,0.00961178  
 ,-0.02906578,-0.00649053,-0.01021870,0.01845807,0.00069614,0.13627618,  
 -0.00234759,-0.00113510,-0.00100509,0.01053530,-0.01031147,0.00823743,  
 0.11807809,-0.21541161,-0.02255982,0.00217641,-0.02782932,-0.00726573,  
 -0.00211070,0.00450643,0.00136319,-0.12687710,0.25446242,-0.00099575,-  
 0.00389418,-0.00826693,-0.02102092,0.02489361,0.00505251,0.00855579,0.  
 00045365,-0.05848538,0.00724405,-0.01182760,0.00556175,0.01410779,-0.0  
 2065650,0.00075125,-0.00902601,0.01712811,0.05269356,-0.01539201,-0.01

346783,0.01882120,-0.20681767,-0.05999972,0.13392290,0.01266606,0.0028  
 0087,-0.01171426,0.00035151,0.00062216,0.00006921,-0.00148752,-0.00029  
 169,-0.00320228,0.00064330,-0.00004315,0.00102077,0.21152992,0.0094308  
 0,0.01885437,-0.00665788,-0.06027718,-0.09051733,0.06348121,-0.0170458  
 3,0.00158522,0.01446045,0.00239052,0.00252674,-0.00680265,0.00262178,0  
 .00147766,0.00209726,-0.00059634,0.00167778,-0.00225064,0.06744593,0.0  
 6203566,-0.00766564,0.00050667,0.00969262,0.13258776,0.05722887,-0.185  
 07158,0.01562570,0.00936105,-0.01394416,0.00254343,0.00203624,0.001602  
 08,-0.00235038,0.00166532,-0.00264819,-0.00019050,0.00079621,-0.000041  
 95,-0.13676316,-0.07252648,0.18556156,-0.06198214,-0.01369988,-0.04148  
 048,-0.00658712,-0.00421918,-0.03859101,-0.00500767,0.00633678,0.00186  
 144,0.00060077,-0.00047674,0.00159363,0.00026719,-0.00034031,0.0002501  
 3,-0.00043438,-0.00022979,-0.00204556,0.00110458,0.00121045,0.00073706  
 ,0.06239295,-0.01689742,-0.03787317,-0.01123709,0.01255566,-0.00620803  
 ,0.01166413,-0.00054269,0.00420785,0.00000230,0.00116860,0.00076007,-0  
 .00003464,-0.00002818,-0.00003823,-0.00020468,-0.00002149,-0.00068781,  
 -0.00074185,-0.00009541,-0.00195125,-0.00147426,0.00570119,0.04420370,  
 -0.04311079,-0.01167007,-0.32911196,-0.00371537,0.00038034,-0.00466901  
 ,0.00120581,-0.00323972,0.00075106,-0.00061940,-0.00044503,-0.00014061  
 ,-0.00000323,0.00000126,0.00016782,0.00019681,0.00012084,0.00065826,-0  
 .00013460,0.00188204,0.00165676,0.05164751,0.01496948,0.34981379,-0.16  
 635836,-0.10162930,0.09779343,-0.02505356,-0.01940968,0.02067974,0.000  
 74435,0.00328332,0.00065784,0.00137497,0.00056199,0.00127188,-0.000137  
 66,-0.00005425,-0.00088080,-0.00013481,-0.00030581,-0.00051807,-0.0033  
 9682,0.00096159,-0.00287155,0.00622953,0.00612591,-0.00351333,0.181575  
 21,-0.10422692,-0.12374442,0.08853494,0.01239337,0.00362891,-0.0061004  
 4,0.00065651,-0.00245513,-0.00055757,-0.00074821,-0.00035968,-0.001128  
 89,-0.00040041,0.00029125,-0.00030918,0.00032524,-0.00005789,0.0002460  
 2,0.00222224,0.00262274,0.00175531,0.00463594,0.00193566,-0.00303927,0  
 .10629715,0.13254487,0.10026579,0.09120479,-0.15492658,-0.00255855,-0.  
 00955697,0.00861330,-0.00111176,-0.00343044,0.00126114,-0.00046708,0.0  
 0049835,-0.00099560,0.00062673,0.00007707,-0.00036032,0.00030177,-0.00  
 007621,-0.00003657,-0.00202116,0.00497788,0.00187484,0.01850869,0.0156  
 7166,-0.00890571,-0.11003624,-0.09563256,0.15241850,-0.04385895,0.0556  
 6370,0.01328568,-0.00058781,0.03231984,0.00892513,0.00073962,-0.011482  
 68,0.00035048,-0.00130604,-0.00128364,-0.00526643,-0.00022616,0.000393  
 17,-0.00034222,0.00065527,0.00050965,0.00214597,0.00081003,-0.00514680  
 ,-0.00143150,0.00316246,-0.00791787,-0.00191175,0.00487980,-0.02068067  
 ,-0.00337516,0.03751456,0.02418782,-0.24436521,-0.05107704,0.01518240,  
 -0.01981413,0.00217019,-0.00077526,0.00222129,-0.00112985,-0.00084055,  
 -0.00005110,-0.00192787,-0.00032652,-0.00028424,-0.00002384,-0.0001646  
 1,-0.00113700,-0.00056148,0.00074444,0.00107929,0.00081397,0.00132282,  
 -0.00448047,0.00110733,0.00433815,-0.01461133,-0.00378219,-0.04335786,  
 0.28087462,0.00587019,-0.04277624,-0.02935464,0.00134468,0.00574595,-0  
 .00363654,0.00080373,-0.00715321,-0.00024846,-0.00104080,-0.00059889,-  
 0.00275369,0.00006097,0.00056562,-0.00056102,0.00066985,0.00004096,0.0  
 0110412,0.00009425,0.00195306,0.00110797,0.00740643,-0.02872284,-0.010  
 13465,-0.00243593,0.01617919,0.00090348,-0.01168558,0.05432394,0.04387  
 825,-0.00111563,0.00556815,0.00126785,0.00151615,-0.00747559,0.0015493  
 8,-0.00282298,-0.02497295,-0.03190601,-0.07566020,0.07749131,0.1589080  
 8,0.00098762,-0.00135054,-0.00028633,0.00020958,0.00061471,0.00053194,  
 -0.00001137,-0.00099490,-0.00022123,0.00025383,-0.00004830,-0.00004165  
 ,0.00027735,-0.00047425,-0.00013303,-0.00178278,-0.00031083,-0.0010877  
 9,0.07814844,0.00125595,-0.00294459,-0.00083515,-0.00392159,-0.0021352  
 1,0.00042768,0.01075221,-0.01634212,-0.02738994,0.04259807,-0.12472341

, -0.16960456, 0.00062101, 0.00215552, 0.00080792, -0.00389385, -0.00407643,  
 -0.00278913, 0.00006217, 0.00060911, -0.00016289, -0.00024130, 0.00013170, -  
 0.00006720, -0.00016906, 0.00020501, 0.00004863, 0.00098318, 0.00056828, 0.0  
 0044245, -0.04804681, 0.14655213, 0.00039452, 0.00037845, 0.00051023, -0.002  
 03437, -0.00260658, -0.00401393, 0.00592370, 0.00925427, -0.00388740, 0.1223  
 0686, -0.21125997, -0.33561781, 0.00160409, 0.00225870, 0.00310317, 0.001208  
 72, 0.00322010, 0.00100938, -0.00009288, -0.00061424, 0.00021004, 0.00011216  
 , 0.00010779, -0.00008575, -0.00014698, 0.00005246, 0.00015353, -0.00069461,  
 0.00008682, -0.00030482, -0.12858121, 0.19912219, 0.33892336, -0.00000178,  
 -0.00000147, 0.00000990, 0.00000410, 0.00000261, -0.00000013, 0.00000206, -0  
 .00001147, -0.00000678, 0.00000411, 0.00000849, 0.00000024, 0.00000390, 0.00  
 000017, 0.00000393, -0.00000712, 0.00000031, 0.00000303, -0.00000153, 0.0000  
 0095, -0.00000046, 0.00000052, 0.00000125, -0.00000284, 0.00000134, 0.000000  
 72, -0.00000144, -0.00000008, 0.00000076, -0.00000392, -0.00000551, -0.00000  
 233, -0.00000153, @

## Structure 24

|                | 1<br>?A   | 2<br>?A  | 3<br>?A  |
|----------------|-----------|----------|----------|
| Frequencies -- | -345.5184 | 154.4025 | 176.1907 |

Zero-point correction= 0.095523 (Hartree/Particle)  
 Thermal correction to Energy= 0.100707  
 Thermal correction to Enthalpy= 0.101651  
 Thermal correction to Gibbs Free Energy= 0.068071  
 Sum of electronic and zero-point Energies= -192.673418  
 Sum of electronic and thermal Energies= -192.668235  
 Sum of electronic and thermal Enthalpies= -192.667291  
 Sum of electronic and thermal Free Energies= -192.700871

1\1\ UOFC-OXYGEN\Freq\RMP2-FU\6-31G(d)\C3H7O1(1+)\JMCXON\02-Apr-1996\  
 0\#MP2=(FULL) 6-31G\* FREQ, IOP(7/33=1)\1,1\  
 C,-0.5131620057,-0.2968683014,-0.8494013447\C,-0.5138423186,-0.2897028  
 718,0.6380667992\C,0.6947762623,-0.2918516517,1.3930897384\O,0.2956913  
 956,0.8379699472,-1.143602372\H,-1.4608135664,-0.2922677342,1.18523905  
 95\H,-1.5222617198,-0.243507138,-1.2635245707\H,-0.0296585352,-1.21355  
 29904,-1.2170408507\H,-0.2628019014,1.5370692955,-1.5312681172\H,1.602  
 6891983,-0.1138552382,0.8210891088\H,0.6669957995,-1.3661082228,1.7265  
 145489\H,0.6336879326,0.2589994006,2.3372786403\Version=SGI-G94RevB.3  
 \HF=-192.2097157\MP2=-192.7689419\RMSD=4.070e-09\RMSF=6.308e-07\Dipole  
 =-0.9742789,-0.5019919,0.8907281\DipoleDeriv=0.2329209,0.1054762,0.088  
 429,0.0469798,0.2943634,0.0812891,0.0043739,-0.1841813,0.1431839,0.626  
 7036,-0.0855629,0.3029531,-0.1027348,0.3838759,-0.2736788,0.2424544,-0  
 .1754442,0.9829647,-0.3240706,0.1587041,-0.3192383,0.3639951,-0.299844  
 2,0.3594286,-0.3696798,0.1493473,-0.59386,-0.3022419,-0.141588,-0.0061  
 696,-0.0874679,-0.648925,0.1331307,0.0113896,0.2299285,-0.7311685,0.09  
 71107,-0.0017361,-0.0088803,0.0250322,0.1753481,-0.0506733,-0.0098026,  
 0.0077319,0.079704,0.0097648,-0.0307308,-0.0079331,-0.001181,0.0619282  
 ,0.0511131,0.0030889,0.0304504,0.0632592,0.0844917,0.0337439,-0.008648  
 9,0.0243581,0.0532958,0.0615671,-0.0211965,0.0172071,0.128265,0.237931  
 1,-0.0199944,0.0382614,0.0121584,0.4151091,-0.0720492,-0.0142443,-0.01  
 63798,0.3335395,0.1663003,-0.0052297,0.0139661,-0.0484827,0.1543961,-0  
 .0571048,0.0166901,-0.0125773,0.0910692,0.0788329,-0.0360089,-0.083080  
 6,-0.1787816,0.2112924,-0.1477457,0.0463067,-0.0281469,0.2602698,0.092



2563,0.0229265,-0.0096587,-0.0538755,0.1991602,-0.0852768,0.0906197,-0.0179355,0.2427732\Polar=32.7145829,-0.0590527,29.4334992,4.2594689,-4.2519626,38.6473227\PG=C01 [X(C3H7O1)]\NImag=1\0.62093995,-0.06448535,0.48128864,0.08377537,0.01833497,0.49893041,-0.10126504,0.02215662,-0.00601259,0.69276032,0.01979136,-0.05300751,-0.02347222,0.00945942,0.24126820,-0.02986495,-0.02502510,-0.23152650,-0.01176051,0.03192336,0.57726583,0.00941762,0.00129167,-0.00522818,-0.29272566,-0.01698611,-0.09211872,0.65748060,-0.02154476,0.01225838,0.00078316,-0.02427818,-0.05314219,-0.04277845,0.06242570,0.41445163,-0.02811201,0.01156434,-0.01367711,-0.08879587,-0.02261083,-0.15108134,-0.04163950,0.05889542,0.60050672,-0.13273124,-0.05411265,-0.02631468,-0.00565441,-0.00733396,0.02488613,-0.00092033,0.00709521,-0.00047491,0.34621968,-0.08886324,-0.18393311,0.02841830,-0.01915953,-0.03198406,0.02497217,0.00084957,0.00355021,0.00241098,-0.08069567,0.50787708,0.01478513,0.08743836,-0.05648786,0.02175934,0.02111810,-0.00596749,-0.00381504,0.00876564,-0.00677041,0.09963472,-0.22418511,0.13091670,0.00632432,-0.00171043,-0.00361602,-0.27812244,0.00191112,0.12172087,-0.01775793,-0.00262217,0.01520915,0.00068267,0.00035077,-0.00000878,0.28780200,0.00141616,0.03415229,0.01485820,-0.00538999,-0.07521134,-0.00546433,0.00628819,0.01235436,-0.00632915,0.00199259,0.00217528,-0.01129812,0.00061979,0.02377741,0.02271830,-0.00613233,-0.00500015,0.12760244,0.00350933,-0.13991094,-0.02042380,-0.00252057,0.01435590,0.00076466,0.00372826,-0.00187498,-0.12939868,0.00041794,0.13672924,-0.29551946,0.02006802,-0.10108465,0.00574255,-0.00043397,0.00460088,0.00041082,0.00157642,0.00126731,-0.01409626,-0.00664074,-0.00291855,0.00080403,-0.00105691,-0.00011684,0.31302930,0.02496320,-0.05765755,0.01323176,0.00062902,-0.00168434,-0.00318560,-0.00025213,0.00244572,0.00095217,-0.03237934,-0.00687744,-0.01005706,0.00018525,-0.00110770,0.00034080,-0.01498103,0.06188940,-0.09663260,0.00969429,-0.09470342,-0.03648446,0.00568987,-0.01719819,0.00288951,-0.00316339,-0.00534680,0.01372793,0.00206745,0.00463990,0.00005723,-0.00077586,0.00147736,0.10522812,-0.01134834,0.10191657,-0.10991249,0.11032523,0.03936857,0.00037166,-0.00061325,0.00016149,0.00083509,0.00185540,-0.00120937,0.00813897,-0.02620777,-0.00137362,0.00042644,-0.00027135,-0.00004582,-0.01147833,0.02418789,0.01163506,0.11306039,0.10247463,-0.20793026,-0.06437306,-0.00150425,0.00059588,-0.00908912,0.00121454,-0.00108041,0.00207125,0.00470906,-0.03203202,-0.00284309,-0.00050187,-0.00447614,0.00023628,0.00066753,0.00001852,-0.00178477,-0.10547130,0.24706301,0.04017350,-0.08792701,-0.08822146,0.02108324,-0.02871012,-0.01642171,-0.00025505,0.00581159,0.00243821,-0.00562860,0.01400770,0.00976847,-0.00095548,0.00350616,-0.00398053,-0.00697522,0.01195103,0.00708085,-0.04742912,0.08057986,0.08944541,0.00581545,-0.03516478,0.01922055,-0.00202525,-0.00384757,-0.00461916,0.00028782,-0.00114905,0.00129912,-0.20272823,0.22070596,-0.12726620,-0.00003580,0.00176623,0.00059799,0.00075525,-0.00230878,0.00044976,-0.00081494,-0.00195722,0.00061722,0.19757365,0.02098267,-0.02139207,0.01353011,-0.00105062,-0.00299588,0.00166585,-0.00056936,0.00099734,-0.00144241,0.16202539,-0.25893465,0.13292986,0.00012015,-0.00131300,-0.00009188,0.00071429,0.00313763,-0.00132565,-0.00326812,-0.00383731,0.00262579,-0.17889002,0.28456649,-0.00448827,-0.00008066,-0.00853920,0.00031921,0.00514652,-0.00056764,-0.00046530,0.00100827,-0.00105660,-0.10353571,0.14929960,-0.07558780,0.00028505,-0.00111986,-0.00044342,-0.00040238,-0.00156756,0.00247504,-0.00161681,-0.00423580,0.00123884,0.10991692,-0.14823013,0.08323752,0.00004232,0.00060502,0.00102433,-0.02543559,-0.00392788,0.01380972,-0.25675236,-0.04560841,0.12999843,0.00103458,-0.00011635,0.00039370,-0.00182422,-0.00162046,-0.00317139,0.00017406,-0.00003667,0.00023215,-0.00

012540,-0.00007697,-0.00028586,0.00037665,0.00036813,0.00022701,0.2758  
5213,0.00055549,-0.00319602,-0.00088982,0.00722429,-0.00208435,0.00146  
781,-0.04591221,-0.05573453,0.01917745,-0.00081699,-0.00064644,0.00114  
876,0.00119545,0.00697735,0.00049338,-0.00003726,-0.00028781,0.0000865  
3,-0.00001296,0.00015888,-0.00088742,0.00000339,-0.00001692,-0.0000068  
0,0.04688000,0.05466318,-0.00040871,-0.00002868,0.00072198,-0.01998469  
,-0.00501281,0.01791724,0.13560110,0.02091382,-0.14492590,-0.00059271,  
0.00063207,-0.00220032,-0.00340932,0.00218963,-0.00258845,0.00027335,0  
.00002932,0.00008952,0.00033868,-0.00024584,0.00007461,0.00026930,0.00  
023149,-0.00026642,-0.13890721,-0.02612963,0.14455731,0.00347122,-0.00  
221381,-0.00184075,0.00191789,0.02046309,0.00111815,-0.04105761,0.0187  
1930,-0.00888264,-0.00095958,-0.00164490,-0.00037414,0.00062523,-0.004  
59261,0.00127003,-0.00026329,-0.00017316,0.00031783,-0.00076448,0.0006  
6089,-0.00113424,0.00031776,-0.00018374,0.00015933,0.00303639,-0.02410  
535,0.00782331,0.03219250,0.00242903,-0.00270203,-0.00136050,0.0063136  
7,-0.01941785,0.01204973,-0.00816362,-0.22978658,0.06675288,-0.0003655  
2,0.00068522,-0.00128527,0.00069347,0.00363873,0.00018090,0.00008104,0  
.00018559,0.00033400,-0.00037145,0.00132264,-0.00105194,0.00042000,-0.  
00017191,-0.00014821,0.00221405,-0.00399448,-0.00048104,-0.00501262,0.  
26885373,0.00176820,-0.00364129,-0.00127558,-0.00330513,0.01752477,-0.  
01153417,0.00259286,0.08259829,-0.04316090,-0.00217155,-0.00086776,0.0  
0063767,0.00001571,-0.00005017,0.00047343,-0.00020157,-0.00050751,0.00  
016157,-0.00012532,-0.00005540,-0.00138030,-0.00004954,-0.00007848,-0.  
00052649,-0.00124613,0.01221842,-0.00527046,-0.00063846,-0.08075476,0.  
05791918,-0.00658266,0.00324045,0.00070805,0.00443598,-0.01848226,-0.0  
2793390,-0.05921806,0.00353053,0.02134029,0.00101414,0.00142190,-0.000  
81656,0.00107569,0.00084836,0.00020310,0.00044132,0.00016575,-0.001420  
52,0.00026310,-0.00021503,0.00078961,0.00047765,-0.00024878,-0.0003990  
4,0.00362143,0.01502616,0.01899690,0.00148396,0.00176195,0.00336092,0.  
05298744,0.00228079,0.00211926,0.00093910,0.00559956,-0.00233657,0.013  
46369,-0.00018624,-0.10631392,-0.13144211,-0.00011812,0.00011992,-0.00  
173208,-0.00024152,-0.00096725,-0.00016211,0.00004261,-0.00006202,0.00  
052587,-0.00015232,0.00019722,0.00009436,0.00042185,-0.00003971,-0.000  
06537,0.00131954,0.00416114,0.00790167,-0.00191710,-0.01861307,-0.0263  
8610,-0.00704904,0.12173499,-0.00371396,-0.00419690,-0.00022112,-0.004  
42099,-0.00510597,-0.02097509,0.02286212,-0.13031376,-0.25128177,-0.00  
029529,-0.00048366,0.00292613,0.00010029,0.00406556,0.00076254,0.00032  
956,0.00016099,-0.00059240,0.00029625,-0.00026032,-0.00004240,-0.00043  
595,0.00018545,0.00003619,-0.00207476,-0.00667868,-0.00810912,0.002181  
58,0.00576420,0.00395606,-0.01482884,0.13686308,0.27354097\\0.00000019  
,0.00000095,-0.00000010,0.00000012,-0.00000062,0.00000178,-0.00000056,  
-0.00000170,-0.00000148,0.00000012,0.00000015,-0.00000036,-0.00000010,  
-0.00000042,-0.00000005,0.00000001,0.00000003,0.00000007,-0.00000007,0  
.00000013,0.,0.00000010,-0.00000003,-0.00000011,0.00000062,-0.00000007  
,0.00000014,0.00000009,0.00000012,0.00000019,-0.00000050,0.00000146,-0  
.00000007\\\\@

## Structure 25

?A ?A ?A ?A ?A  
Frequencies --- -202.2282 234.0467 269.6197 338.0039 413.3676

Zero-point correction= 0.095633 (Hartree/Particle)  
Thermal correction to Energy= 0.100556  
Thermal correction to Enthalpy= 0.101500

```

1\ \ OXFUC-OXYGEN\FREQ\FREQMP2-FU6-31G(d)\C3H7O1(1+)\JMC0XON\22-Feb-1996\
1\ \#MP2=(FULL) 6-31G* FREQ,IOP(7/33=1) GUESS=READ\
\1,1\C\C,1,R2\C,2,R3,1,A3\O,3,R4,2,A4,1,D4,0\H,3,R5,2,A5,1,D5,0\H
,3,R6,2,A6,1,D6,0\H,2,R7,3,A7,1,D7,0\H,1,R8,2,A8,3,D8,0\H,1,R9,2,A9,3,
D9,0\H,1,R10,2,A10,3,D10,0\H,4,R11,3,A11,2,D11,0\VR2=1.4234213\VR3=1.47
797396\VR4=1.41761559\VR5=1.09351043\VR6=1.1017111\VR7=1.09134977\VR8=1.090
81637\VR9=1.0913079\VR10=1.12881517\VR11=0.97573201\VA3=125.20831204\VA4=10
1.99051913\VA5=112.47373545\VA6=108.85980835\VA7=115.08344073\VA8=115.5097
9071\VA9=115.54950907\VA10=96.15766413\VA11=110.67517619\VD4=-117.81179624
\VD5=-0.18745968\VD6=120.03382189\VD7=170.12856034\VD8=-164.50721\VD9=-25.5
2940439\VD10=85.38533975\VD11=248.19618891\Version=SGI-G94RevB.3\VF=-19
2.2122444\MP2=-192.7720926\RMSD=1.546e-09\RMSF=3.786e-05\Dipole=-0.696
8523,0.8516571,-0.3664906\DipoleDeriv=-0.0889417,0.0115385,0.0223089,-
0.1100287,-0.1853282,-0.7613673,-0.1022337,-0.2104316,-0.7069941,0.431
9902,0.0300043,0.2036189,0.0189499,0.2688428,0.1148551,0.3275579,0.089
4801,1.2908514,0.1068925,-0.0605767,-0.1279862,-0.0500515,0.3027006,-0
.1775925,-0.1822463,-0.2521489,0.1259703,-0.5174888,-0.0530934,-0.1173
768,0.006434,-0.474395,0.2558595,-0.1172322,0.3364672,-0.7084212,0.092
4615,-0.0058248,0.037965,0.0164978,0.0762936,0.035259,0.0530858,0.0353
411,0.0278484,0.1196075,0.0349386,0.0107203,0.0546604,0.0673044,0.0715
593,0.0146627,-0.0051001,0.1008697,0.1166576,0.0079385,-0.0070528,-0.0
12773,0.0964804,0.0006106,-0.0066152,-0.0001101,0.0748948,0.1208314,-0
.0007132,0.0684935,0.0158795,0.187345,0.1172786,0.0374586,0.0032376,0
.1551139,0.0722146,-0.0182331,-0.0663056,0.0015267,0.1640819,0.0994136,
-0.041502,-0.0077039,0.1616388,0.2106427,0.0060638,-0.0087693,0.045257
7,0.2245059,0.3045722,-0.0372135,0.0939963,0.0559986,0.3351324,0.04795
73,-0.0156159,0.0136472,0.2721686,-0.0604481,0.0542779,-0.0830277,0.42
22293\Polar=31.0592781,-0.1080619,27.6904227,4.5109554,-2.0959286,44.3
503319\PG=C01 [X(C3H7O1)]\NImag=1\0.65629280,0.02524865,0.40137013,0.
00715464,-0.09790930,0.61539396,-0.11629864,-0.00619924,0.00941431,0.6
3608886,-0.00240410,-0.06488692,0.02696376,0.04535690,0.25255365,0.001
05656,0.05713863,-0.33724952,-0.04762618,-0.03521347,0.64609039,0.0055
7928,0.01092020,-0.00274212,-0.21881743,-0.01200395,-0.06185899,0.5977
2669,-0.01884027,0.03113129,-0.00582723,0.00336822,-0.06168487,-0.0218
2472,0.00520385,0.48173859,-0.02888181,0.00446448,-0.01844506,-0.05115
596,-0.02195945,-0.11536534,-0.08163279,0.04980568,0.54065941,0.001832
25,-0.01027190,-0.00174128,-0.00017067,0.02418260,-0.01070900,-0.05846
483,-0.01334523,0.01865161,0.06095100,0.00200900,0.00336702,-0.0004050
5,0.01222241,-0.03072231,0.02874401,-0.00873348,-0.20105528,0.03438115
,-0.00310634,0.31984967,0.00081411,-0.01541686,-0.00237434,-0.00836739
,0.03120058,-0.01742847,0.03067186,0.12966438,-0.12686893,-0.10707309,
-0.04221579,0.61629624,0.00330020,-0.00210105,0.00123551,-0.02817276,0
.00325795,0.01298096,-0.25191367,0.01005494,0.12642381,0.00668568,-0.0
0434172,-0.00014790,0.27059183,0.00082804,-0.00188950,-0.00017690,-0.0
0128267,0.00012163,-0.00257376,0.01240071,-0.04817782,-0.00932591,-0.0
2339653,-0.00735865,0.02556023,-0.00595417,0.05886759,-0.00057885,-0.0
0132518,0.00196066,-0.02631090,0.00215161,0.01008770,0.12820385,-0.007
08334,-0.12948317,0.01325788,0.00847519,-0.01519702,-0.13357849,-0.002
73014,0.14327536,-0.00478792,0.00405865,-0.00216905,0.00271539,-0.0235

```

6854,-0.01854286,-0.05317105,-0.00444139,-0.00280243,0.00116432,-0.003  
 33495,0.00436539,0.00250662,0.02320108,0.01819599,0.04732941,0.0011505  
 8,-0.00162533,0.00325908,-0.00756754,-0.00028308,-0.00630392,0.0107637  
 3,-0.20352812,-0.11696921,-0.00271055,-0.03145690,-0.01149190,-0.00134  
 228,0.00037041,-0.00116764,0.00113342,0.23534374,-0.00462472,0.0034948  
 1,-0.00122901,0.00323313,-0.01787819,-0.01485680,-0.00022237,-0.137947  
 76,-0.14856330,0.00139044,0.02744266,0.01201995,-0.00108084,-0.0122491  
 9,-0.00787076,-0.00030585,0.13537180,0.15502285,0.00650008,-0.00099995  
 ,-0.00326058,-0.28195444,-0.03647007,0.12198510,-0.01753379,-0.0046462  
 2,0.01201780,0.00397189,-0.00188221,0.00189492,-0.00173743,-0.00065536  
 ,-0.00305978,0.00014951,-0.00042429,-0.00027752,0.28816741,0.00869640,  
 0.01729597,-0.00558294,-0.04231452,-0.06771931,0.01956403,-0.01091890,  
 0.00484932,0.01109775,0.00585206,0.00385244,-0.00107001,-0.00037009,0.  
 00174714,-0.00209139,0.00271579,0.00110870,0.00129924,0.04493983,0.035  
 33391,0.02842052,0.01018520,-0.01088334,0.12222458,0.01880437,-0.13246  
 167,-0.02101668,-0.00084637,0.01290956,0.00206302,-0.00115032,0.001046  
 09,-0.00303247,0.00078384,-0.00300694,0.00125074,-0.00029498,0.0007674  
 7,-0.12732345,-0.02505705,0.13458693,-0.27940278,0.06032242,-0.1031680  
 6,0.00521133,-0.00314973,-0.00162261,0.00092202,0.00482798,0.00303890,  
 -0.00021553,0.00022548,-0.00111487,0.00010024,-0.00006742,-0.00003728,  
 0.00105100,-0.00052470,0.00062408,0.00115274,-0.00193265,-0.00012553,0.  
 28932995,0.05873858,-0.05737669,0.04194600,-0.00762138,-0.00368093,-0.  
 01311383,0.00116862,0.00516806,0.00142041,-0.00002129,0.00054741,-0.0  
 0139169,-0.00002435,-0.00007374,0.00003068,0.00071120,-0.00090163,0.00  
 034772,0.00066549,-0.00228119,0.00012575,-0.06712277,0.06309265,-0.100  
 02176,0.03927509,-0.10351986,-0.03394550,0.01054016,-0.01694245,0.0024  
 1665,-0.00342837,-0.00393168,0.00084606,0.00041884,0.00052365,0.000220  
 34,0.00017477,0.00034157,-0.00131409,0.00042966,-0.00071060,0.00036317  
 ,-0.00194863,0.00114944,0.11506834,-0.03618116,0.11072710,-0.25038171,  
 -0.09471488,0.09333457,0.00405872,0.00350844,0.00400993,0.00247550,0.0  
 0325511,-0.00110984,-0.00035355,-0.00053635,-0.00078752,-0.00034630,-0.  
 00012132,0.00093117,-0.00017272,0.00006568,0.00026292,0.00145100,-0.0  
 0437068,-0.00129597,-0.01267625,-0.01087589,0.01150767,0.25788385,-0.0  
 9273651,-0.08569619,0.05778951,0.00644047,-0.00030413,-0.01062058,-0.0  
 0043626,-0.00277362,-0.00045920,0.00024674,-0.00038693,0.00157507,0.00  
 042156,0.00024915,0.00035813,-0.00010429,-0.00007153,-0.00047659,-0.00  
 059000,0.00415860,-0.00180198,0.00772324,0.00410193,-0.00639169,0.1017  
 4866,0.09303489,0.09080499,0.05531042,-0.10352491,0.03241609,0.0160959  
 7,-0.01713447,0.00002965,-0.00294986,0.00003260,0.00018088,-0.00071265  
 ,0.00214520,-0.00084913,0.00031780,-0.00013630,-0.00047592,0.00042951,  
 -0.00020935,-0.00158041,-0.00102864,-0.00479684,-0.01013819,-0.0084533  
 7,0.00829531,-0.10644128,-0.05519793,0.11140631,-0.02253241,0.01795693  
 ,0.00295448,-0.00498759,0.00141056,0.00005946,0.00071230,0.00301095,0.  
 00069407,-0.00043400,0.00013418,-0.00075395,-0.00064506,-0.00052405,-0.  
 00000927,0.00031015,0.00000128,0.00061568,0.00043409,-0.00321125,-0.0  
 0021668,-0.00538726,0.02442685,0.00478839,-0.00167346,-0.02318605,-0.0  
 0433373,0.03442488,0.01723214,-0.24296097,-0.01998159,-0.00105406,-0.0  
 2011478,-0.01813423,0.00180237,0.00246018,0.00143393,0.00079813,-0.000  
 89186,0.00184184,-0.00022437,0.00001069,0.00037949,0.00024423,-0.00141  
 014,0.00032702,-0.00042855,0.00159944,-0.00080255,-0.00055684,-0.00893  
 547,-0.00290208,0.00191473,-0.01221022,-0.00351193,-0.02032015,0.28232  
 130,0.00614929,-0.05742853,-0.04119545,0.00145082,-0.03079815,0.001171  
 31,0.00192943,0.00982880,0.00080760,-0.00303041,0.00134978,-0.00470068  
 ,-0.00042307,-0.00049179,-0.00043515,0.00197084,-0.00071700,0.00155447  
 ,-0.00019444,0.00480419,0.00106058,-0.00236412,0.01549837,0.00420178,-

0.00045689,0.01536622,0.00395463,-0.00374753,0.04187006,0.03307818,-0.00010116,-0.00421983,-0.00101241,0.00232721,-0.00012007,0.00026762,-0.00751503,0.01155206,0.00475664,-0.01496656,0.00734398,0.08049843,-0.00036937,-0.00442828,0.00298567,0.00290528,-0.00054531,0.00038505,-0.00060107,0.00091401,-0.00094808,-0.00008546,-0.00004506,0.00007071,-0.00026508,0.00047244,0.00038705,-0.00022165,0.00059236,-0.00128392,0.01889289,0.00007749,0.00127119,-0.00007533,-0.00134859,-0.00327896,0.00233782,-0.01016688,-0.00812774,0.04611037,0.02177232,-0.05574462,-0.11825584,0.00062358,-0.00386689,0.00300259,-0.00061520,0.00245386,0.00026847,0.00049133,0.00005499,0.00005409,0.00025500,0.00033961,0.00001341,0.00012650,-0.00010196,-0.00029933,0.00030075,0.00013183,0.00071804,-0.01151630,0.06686868,-0.00029296,0.00221124,0.00106687,-0.00133301,0.00009280,-0.00591069,0.00422151,-0.00939123,-0.01175170,0.08616389,-0.05632782,-0.46546168,-0.00174871,0.00071106,0.00046405,-0.00017276,-0.00254541,0.00407510,-0.00056482,0.00001345,-0.00037126,-0.00016067,-0.00022888,-0.00013427,0.00004523,-0.00014097,-0.00003219,-0.00005093,-0.00051996,0.00050273,-0.08610676,0.06612570,0.47755304,-0.00005801,0.00004449,0.00001253,0.00004109,-0.00016173,0.00004419,0.00000552,0.00008754,0.00000086,-0.00001371,-0.00000800,-0.00002545,0.00000039,-0.00000613,-0.00000042,0.00000663,-0.00000357,0.00000004,-0.00001071,0.00004421,-0.00000888,0.00002109,0.00000792,-0.00002284,0.00000663,-0.00000307,0.00000049,0.00000400,-0.00000635,-0.00000188,-0.00000292,0.00000468,0.00000136\\@

## Structure 29

|                                              | 1<br>?A                     | 2<br>?A  | 3<br>?A  |
|----------------------------------------------|-----------------------------|----------|----------|
| Frequencies --                               | -95.5704                    | 164.3975 | 272.2193 |
| Zero-point correction=                       | 0.094600 (Hartree/Particle) |          |          |
| Thermal correction to Energy=                | 0.099692                    |          |          |
| Thermal correction to Enthalpy=              | 0.100637                    |          |          |
| Thermal correction to Gibbs Free Energy=     | 0.067442                    |          |          |
| Sum of electronic and zero-point Energies=   | -192.684435                 |          |          |
| Sum of electronic and thermal Energies=      | -192.679343                 |          |          |
| Sum of electronic and thermal Enthalpies=    | -192.678399                 |          |          |
| Sum of electronic and thermal Free Energies= | -192.711593                 |          |          |

Test job not archived.

1\1\ UOFC-OXYGEN\Freq\RMP2-FU6-31G(d)\C3H7O1(1+)\JMCXON\23-Mar-1996\1\# MP2=(FULL) 6-31G\* FREQ, IOP(7/33=1)\\  
 \1,1\C\C,1,R2\C,2,R3,1,A3\O,3,R4,2,A4,1,D4,0\H,3,R5,2,A5,1,D5,0\H,3,R6,2,A6,1,D6,0\H,2,R7,3,A7,1,D7,0\H,1,R8,2,A8,3,D8,0\H,1,R9,2,A9,3,D9,0\H,1,R10,2,A10,3,D10,0\H,4,R11,3,A11,2,D11,0\R2=1.43948254\R3=1.44401879\R4=1.38856982\R5=1.11451764\R6=1.11451004\R7=1.09396554\R8=1.10477639\R9=1.08864478\R10=1.10477149\R11=0.97423409\A3=124.64811653\A4=110.33480312\A5=105.62829793\A6=105.63220808\A7=116.52008128\A8=107.60849016\A9=115.44875463\A10=107.61122233\A11=110.52921432\D4=-180.00242752\D5=-54.54246213\D6=54.53354202\D7=-180.00030645\D8=-125.18852036\D9=0.00199835\D10=125.19634525\D11=-179.99160118\\Version=SGI-G94RevB.3\\HF=-192.220677\MP2=-192.7790352\RMSD=5.897e-09\RMSF=8.480e-05\Dipole=0.1276769,0.0000623,-1.1049919\DipoleDeriv=-0.2386555,0.0000124,-0.4853158,0.0000159,-0.2470914,0.0001002,-0.3523545,0.0000484,-0.7559778,0.8018419,-0.0000431,0.4099262,-0.0000336,0.2767582,-0.0000498,0.4851904,

-0.0000565,1.0100912,-0.7277022,0.0000449,-0.6355269,0.0001375,0.19295  
 01,0.000171,0.0285926,0.0000633,0.9590995,-0.1854789,0.000019,0.078436  
 6,-0.0000132,-0.5089803,-0.0000483,-0.0910562,-0.0000378,-0.9973379,0.  
 2280242,-0.0102816,0.0871868,-0.0148308,0.1140714,-0.0832929,-0.079428  
 1,-0.0424389,-0.1097272,0.2280519,0.0102713,0.0872237,0.0147557,0.1140  
 766,0.0832043,-0.0794013,0.0424274,-0.109708,0.1546097,-0.0000001,-0.0  
 208175,-0.0000016,0.1340778,-0.000006,-0.0015917,0.0000012,0.1069838,0  
 .2194112,0.0170019,0.2037282,0.016489,0.1904221,-0.0376862,0.036672,-0  
 .0307329,0.1765299,0.0459807,0.,0.0207053,-0.0000034,0.1260981,-0.0000  
 161,-0.0361539,-0.0000011,0.113995,0.219395,-0.0170106,0.2037253,-0.01  
 65077,0.1904183,0.0376151,0.0366723,0.0307239,0.1765288,0.254522,-0.00  
 00139,0.050728,-0.0000079,0.417199,0.0000088,0.0528585,0.0000031,0.429  
 5227\Polar=35.8941727,-0.0001892,24.3978109,6.979331,0.0001179,43.2970  
 468PG=C01 [X(C3H7O1)]\NImag=1\0.63464650,0.00000491,0.47172431,-0.06  
 924856,0.00001695,0.56234783,-0.09904074,-0.00000514,0.03122190,0.6475  
 7167,-0.00000235,-0.08003367,-0.00000560,0.00000747,0.24512462,0.04421  
 580,-0.00001193,-0.29810851,-0.03521620,0.00000778,0.66781389,-0.00819  
 774,0.00000414,-0.02331256,-0.20264780,-0.00000931,-0.05170911,0.50986  
 577,0.00000503,0.02610306,0.00000527,-0.00001510,-0.07726311,-0.000006  
 26,0.00003535,0.44209160,-0.01922000,0.00000019,-0.00710447,-0.1188230  
 9,-0.00000017,-0.16159430,0.02741260,0.00000401,0.59913488,-0.00277653  
 ,0.00000120,0.00098727,0.00409067,-0.00000216,-0.04823521,-0.09976721,  
 -0.00001074,0.01791582,0.46577492,-0.00000088,0.00300132,-0.00000079,0  
 .00000145,0.00327662,-0.00000289,-0.00000489,-0.05261103,-0.00001583,0  
 .00006337,0.03985372,-0.00632925,-0.00000033,-0.00209551,0.00857380,-0  
 .00000331,-0.05037624,0.06108497,-0.00000623,-0.28676585,0.16268358,0.  
 00005823,0.56910859,0.00200287,-0.00660265,0.00175853,-0.02606934,0.02  
 531034,0.00152528,-0.10432702,0.11699302,0.03314372,-0.00185122,0.0032  
 7964,0.00655337,0.12262260,-0.00104895,0.00114237,-0.00143964,0.000135  
 81,-0.00649694,0.00076087,0.10467279,-0.17872446,-0.04580893,-0.002432  
 85,0.00567935,-0.00504999,-0.11891136,0.20570362,-0.00436041,0.0004746  
 7,-0.00401406,-0.00038661,0.01334362,0.01188877,0.01796186,-0.03911434  
 ,-0.06153675,0.02273073,-0.02452925,-0.02550209,-0.04084793,0.05319631  
 ,0.07622557,0.00200501,0.00660139,0.00176015,-0.02607382,-0.02530586,0  
 .00152695,-0.10436014,-0.11700485,0.03316073,-0.00185300,-0.00327860,0  
 .00655310,0.01007928,0.01694727,0.00019907,0.12266142,0.00104741,0.001  
 14041,0.00143738,-0.00012716,-0.00649170,-0.00075748,-0.10469623,-0.17  
 869990,0.04581848,0.00243795,0.00568086,0.00504456,-0.01695237,-0.0260  
 7789,0.00172575,0.11892555,0.20567250,-0.00435966,-0.00047265,-0.00401  
 253,-0.00039132,-0.01334490,0.01188959,0.01798248,0.03912530,-0.061552  
 10,0.02273252,0.02452485,-0.02550075,0.00019951,-0.00172382,0.00227413  
 ,-0.04086599,-0.05320402,0.07623703,0.00883220,-0.00000009,-0.00378432  
 ,-0.28813450,-0.00000107,0.11807298,-0.01573919,-0.00000140,0.01246840  
 ,0.00252295,0.00000016,0.00243370,-0.00245492,-0.00054087,-0.00090916,  
 -0.00245543,0.00054173,-0.00090969,0.29531652,-0.00000222,0.00489457,0  
 .00000010,-0.00000148,-0.06933615,0.00000028,0.00000196,0.03394461,0.0  
 0000015,0.00000011,-0.00325659,0.00000021,-0.00463871,-0.00255052,-0.0  
 0481870,0.00463671,-0.00255022,0.00481886,0.00000174,0.02673363,0.0291  
 8281,-0.00000046,-0.00952026,0.11822612,0.00000159,-0.12720413,-0.0168  
 7457,-0.00000114,0.01248766,0.00150088,0.00000003,0.00169188,-0.001727  
 00,0.00021479,-0.00111158,-0.00172789,-0.00021438,-0.00111227,-0.12630  
 814,-0.00000067,0.12755101,-0.11916223,0.11787224,-0.02609969,-0.00817  
 469,-0.00130953,-0.01516136,0.00729442,0.00301982,-0.00248636,-0.00110  
 424,-0.00038437,0.00081999,-0.00048234,-0.00002516,0.00106756,-0.00029  
 011,-0.00053054,0.00205417,0.00041493,-0.00070015,-0.00029353,0.128567

97,0.11757744,-0.18902074,0.06723304,-0.00116205,-0.00271590,-0.001555  
 49,-0.00159743,-0.00322583,-0.00032408,0.00000728,-0.00031823,-0.00047  
 936,0.00078603,-0.00009824,-0.00031780,-0.00081209,0.00021547,-0.00037  
 808,0.00004199,0.00251641,0.00048295,-0.12492796,0.21535570,-0.0383816  
 0,0.07383707,-0.06650239,-0.02106866,0.02921330,-0.01459231,0.00142120  
 ,-0.00537580,-0.00258722,-0.00075710,-0.00027735,-0.00094935,0.0014918  
 5,0.00023135,0.00067890,-0.00090571,0.00034026,-0.00056034,0.00045345,  
 -0.00249164,0.00099046,0.04736441,-0.07300735,0.07286797,-0.30039784,0  
 .00000809,0.11205448,0.00848011,-0.00000041,-0.00208690,0.00078870,0.0  
 0000010,-0.00125569,-0.00042314,-0.00000003,0.00001365,0.00034892,0.00  
 021244,0.00034668,0.00034881,-0.00021267,0.00034692,0.00065817,0.00000  
 052,-0.00182596,-0.01139470,-0.00338689,0.00612233,0.31299505,0.000007  
 69,-0.05166203,-0.00000580,-0.00000042,-0.00221589,0.00000184,-0.00000  
 028,-0.00269982,-0.00000002,-0.00000004,-0.00033580,-0.00000005,0.0008  
 8065,-0.00014825,0.00008435,-0.00088059,-0.00014806,-0.00008451,-0.000  
 00007,0.00683497,0.00000023,0.02039063,0.00170632,-0.01179174,-0.00000  
 927,0.04689803,0.10750038,-0.00000540,-0.10561806,0.03778438,-0.000001  
 36,-0.01602815,-0.00086887,0.00000057,0.00163728,0.00009990,-0.0000000  
 2,0.00076282,-0.00015332,0.00036631,-0.00061809,-0.00015329,-0.0003664  
 5,-0.00061800,-0.00205015,0.00000003,-0.00453984,-0.01104543,-0.001974  
 74,0.00535789,-0.11982884,0.00000471,0.11425847,-0.11919945,-0.1178836  
 3,-0.02611538,-0.00817300,0.00131237,-0.01516069,0.00729443,-0.0030243  
 4,-0.00248633,-0.00110437,0.00038472,0.00082003,-0.00028919,0.00053124  
 ,0.00205458,-0.00048293,0.00002570,0.00106726,0.00041509,0.00070145,-0  
 .00029345,0.00435001,0.01345784,0.00413959,-0.01139586,-0.02038831,-0.  
 01104629,0.12860429,-0.11758843,-0.18899312,-0.06724121,0.00116599,-0.  
 00271333,0.00156165,0.00159468,-0.00322536,0.00032503,-0.00000708,-0.0  
 0031812,0.00047916,0.00081227,0.00021527,0.00037748,-0.00078571,-0.000  
 09792,0.00031722,-0.0004206,0.00251566,-0.00048288,-0.01346189,-0.024  
 42685,-0.01028771,0.00338811,0.00170804,0.00197635,0.12493993,0.215323  
 88,-0.03839511,-0.07383815,-0.06651162,-0.02107375,-0.02921067,-0.0145  
 9545,0.00142285,0.00537492,-0.00258720,-0.00075665,0.00027704,-0.00094  
 969,-0.00090590,-0.00034013,-0.00056010,0.00149126,-0.00023167,0.00067  
 908,0.00045327,0.00249150,0.00099051,0.00414000,0.01028555,0.00556363,  
 0.00612350,0.01179098,0.00535861,0.04738043,0.07301019,0.07287945,0.00  
 128794,-0.00000045,0.00077818,-0.00182855,0.00000052,0.00222848,0.0097  
 9578,0.00000310,0.02017022,-0.36350882,-0.00006058,-0.24320694,0.00042  
 036,0.00045964,0.00214363,0.00042090,-0.00045938,0.00214380,0.00062417  
 ,0.00000005,0.00014072,-0.00001902,0.00001583,0.00012022,-0.00000823,0  
 .00000002,-0.00023847,-0.00001901,-0.00001579,0.00012008,0.35283448,0.  
 00000035,0.00170353,0.00000029,0.00000062,-0.00113455,0.00000162,-0.00  
 000079,-0.00568976,0.00000116,-0.00005703,-0.00065208,-0.00004289,-0.0  
 0095686,0.00135570,-0.00042209,0.00095678,0.00135646,0.00042174,-0.000  
 00006,0.00025365,-0.00000005,0.00005691,0.00001189,-0.00039039,0.0.00  
 006250,0.,-0.00005698,0.00001185,0.00039044,0.00005704,0.00272082,-0.0  
 0060440,0.00000005,0.00113958,0.00115343,-0.00000029,-0.00909317,-0.03  
 452086,-0.00000631,-0.02953192,-0.17890175,-0.00003403,-0.17942380,-0.  
 00103811,-0.00040713,0.00227531,-0.00103836,0.00040758,0.00227617,0.00  
 007966,-0.00000013,-0.00022344,-0.00035977,0.00003537,-0.00026724,-0.0  
 0001018,0.,0.00004706,-0.00035975,-0.00003528,-0.00026722,0.21560008,0  
 .00004018,0.21306868,-0.00011391,0.00000031,-0.00003927,-0.00008976,-  
 0.00000044,-0.00020628,0.00008863,-0.00000012,-0.00020616,-0.00002448,  
 -0.00000095,0.00027187,-0.00004103,-0.00005005,0.00000213,-0.00004071,  
 0.00005023,0.00000198,0.00001408,0.00000031,0.00003183,0.00004927,0.00  
 002414,0.00000175,0.00001652,0.00000002,-0.00001074,0.00004917,-0.0000
